# **The *R2R3-MYB* gene family in banana (*Musa acuminata*): genome-wide identification, classification and expression patterns.**

Boas Pucker<sup>1</sup>, Ashutosh Pandey<sup>1,2</sup>, Bernd Weisshaar<sup>1</sup>, Ralf Stracke<sup>1,\*</sup>

<sup>1</sup> Bielefeld University, Faculty of Biology, Genetics and Genomics of Plants, Sequenz 1, 33615 Bielefeld, Germany

<sup>2</sup> National Institute of Plant Genome Research, Aruna Asaf Ali Marg, New Delhi, Delhi 110067, India

\* communicating author

## **Abstract**

The *R2R3-MYB* genes comprise one of the largest transcription factor gene families in plants, playing regulatory roles in plant-specific developmental processes, defense responses and metabolite accumulation. To date MYB family genes have not yet been comprehensively identified in the major staple fruit crop banana. In this study, we present a comprehensive, genome-wide analysis of the *MYB* genes from *Musa acuminata* DH-Pahang (A genome). A total of 286 *R2R3-MYB* genes as well as genes encoding three other classes of MYB proteins containing multiple MYB repeats were identified and characterised with respect to structure and chromosomal organisation. Organ- and development-specific expression patterns were determined from RNA-seq data. For 279 *M. acuminata* MYB genes for which expression was found in at least one of the analysed samples, a variety of expression patterns were detected. The *M. acuminata* *R2R3-MYB* genes were functionally categorised which led to the identification of seven clades containing only *M. acuminata* *R2R3-MYBs*. The encoded proteins may have specialised functions that were acquired or expanded in *Musa* during genome evolution. The presented functional classification and expression analyses of the *MYB* gene family in banana establish a solid foundation for future comprehensive functional analysis of MaMYBs and can be utilized in banana improvement programmes.

Keywords: *Musa acuminata*, Zingiberales, *R2R3-MYB*, transcription factor, gene family

## **Introduction**

## *M. acuminata* MYB family

Banana (*Musa* spp.), including dessert and cooking types, is a staple fruit crop for a major world population, especially in developing countries. The crop is grown in more than 100 countries throughout the tropics and sub-tropics, mainly in the African, Asia-Pacific, and Latin American and Caribbean regions (Frison and Sharrock 1999). Bananas provide an excellent source of energy and are rich in certain minerals and in vitamins A, C and B6. Furthermore, this perennial, monocotyledonous plant provides an important source of fibre, sugar, starch and cellulose (used for paper, textiles). Bananas have also been considered as a useful tool to deliver edible vaccines (Langridge 2006). Certain agronomic traits, such as stress and pest resistance as well as fruit quality, are of great importance in this plant species. Banana improvement through breeding exercises has been challenging for various reasons. Therefore, genetic engineering based optimisations hold great promise for improvement of this crop plant species. For this purpose, qualified target genes needs to be identified. The release of a high quality banana genome sequence (D'Hont et al. 2012) provides an useful resource to understand functional genomics of important agronomic traits and to identify candidate genes to be utilized in banana improvement programmes.

As almost all biological processes in eukaryotic cells or organisms are influenced by transcriptional control of gene expression, this regulatory level is a good starting point for genetic engineering. Regulatory proteins perform in transcriptional control, alone or complexed with other proteins, by activating or repressing (or both) the recruitment of RNA polymerase to promoters of specific genes (Cooper 2000). These proteins are designated as transcription factors. Connected to their substantial regulatory complexity, transcription factors are numerous and diverse (Riechmann et al. 2000). By binding to specific DNA sequence motifs and regulating gene expression, transcription factors control various regulatory and signaling networks involved in the development, growth and stress response in an organism.

One of the widest distributed transcription factor families in all eukaryotes is the MYB (myeloblastosis) protein family. In the plant kingdom, MYB proteins constitute one of the largest transcription factor families. MYB proteins are defined by a highly conserved MYB DNA-binding domain, mostly located at the N-terminus of the protein. The MYB domain generally consists of up to four imperfect amino acid sequence repeats (R) of about 50-53 amino acids, each forming three alpha-helices (summarised in Dubos et al. 2010). The second and third helices of each repeat build a helix-turn-helix (HTH) structure with three regularly spaced tryptophan (or hydrophobic) residues, forming a hydrophobic core (Ogata et al. 1996). The third helix of each repeat has been identified as the DNA recognition helix that makes

direct contact with DNA (Jia et al. 2004). During DNA contact, two MYB repeats are closely packed in the major groove, so that the two recognition helices bind cooperatively to the specific DNA recognition sequence motif. In contrast to vertebrates, which solely have MYB transcription factors with three repeats, plants have different MYB domain organisations, comprising one to four repeats (Stracke et al. 2001; Dubos et al. 2010). Particularly the number of MYB proteins with two repeats, named R2R3-MYBs according to repeat numbering in vertebrate MYBs, is extremely extended. Gene numbers are ranging from 45 unique *R2R3-MYBs* in *Ginkgo biloba* (Liu et al. 2017) to 360 in Mexican cotton (*Gossypium hirsutum*) (Salih et al. 2016). The expansion of the R2R3-MYB family was coupled with widening in the functional diversity of R2R3-MYBs, considered to regulate mainly plant-specific processes including secondary metabolisms, stress responses and development (Dubos et al. 2010). In this course R2R3-MYBs are involved in several biological traits, such as for example wine quality in grape, fruit color, cotton fibre length, pollinator preferences and nodulation in legumes.

The identification and functional characterization of the *R2R3-MYB* gene family from banana will provide an insight into the regulatory aspects of different biochemical and physiological processes, as those operating during fruit ripening as well as response to various environmental stresses. In this study, we have used genomic resources to systematically identify members of the *M. acuminata* (A genome) *R2R3-MYB* gene family. We used knowledge from other plant species, including the model plant *A. thaliana*, leading to a functional classification of the banana *R2R3-MYB* genes on the basis of phylogenetic analyses. Furthermore, RNA-seq data was used to analyse expression in different *M. acuminata* organs and developmental stages and to compare expression patterns of closely grouped co-orthologs.

Our findings offer the first step towards further investigations on the biological and molecular functions of MYB transcription factors with the selection of genes responsible for economically important traits in *Musa*, which can be utilized in banana improvement programmes.

## Material and Methods

### Search for MYB protein coding genes in the *M. acuminata* genome

A consensus R2R3-MYB DNA binding domain sequence (Matus et al. 2008) was used as protein query in tBLASTn (Altschul et al. 1990) searches on the *M. acuminata* DH-Pahang

## *M. acuminata* MYB family

genome sequence (version 2) (<http://banana-genome-hub.southgreen.fr/>) in an initial search for MYB protein coding genes. To confirm the obtained amino acid sequences, the putative MYB sequences were manually analysed for the presence of an intact MYB domain. All *M. acuminata* MYB candidates from the initial BLAST were inspected to ensure that the putative gene models encode two or more (multiple) MYB repeats. The identified gene models were analysed to map them individually to unique loci in the genome and redundant sequences were discarded from the data set to obtain unique *MaMYB* genes. The identified *MaMYB* genes were matched to the automatically annotated genes from the Banana Genome Hub database (Droc et al. 2013). The open reading frames of the identified *MaMYB* were manually inspected and, if available, verified by mapping of RNA-seq data to the genomic sequence.

### **Genomic distribution of *MaMYB* genes**

The *MaMYB* genes were located on the corresponding chromosomes by the MapGene2chromosome web v2 (MG2C) software tool ([http://mg2c.iask.in/mg2c\\_v2.0/](http://mg2c.iask.in/mg2c_v2.0/)) according to their position information of a physical map, available from the DH-Pahang genome annotation (V2).

### **Phylogenetic analyses**

Protein sequences of 133 *A. thaliana* MYBs were obtained from TAIR (<http://www.arabidopsis.org/>). We also considered other multiple MYB-repeat proteins from *A. thaliana* in the phylogenetic analysis to determine orthologs in the *M. acuminata* genome: five AtMYB3R, AtMYB4R1 and AtCDC5. Additionally, 43 well-known, functionally characterised landmark plant R2R3-MYB protein sequences were collected from GenBank at the National Center for Biotechnology Information (NCBI) (<http://www.ncbi.nlm.nih.gov/>). Phylogenetic trees were constructed from ClustalΩ aligned MYB domain sequences (294 *MaMYBs*, 132 *AtMYBs* and 43 plant landmark MYBs) using MEGA7 (Kumar et al. 2016) with default settings. A Maximum Likelihood (ML) consensus tree inferred from 1000 bootstrap replications was calculated. Classification of the *M. acuminata* MYB proteins was performed according to their phylogenetic relationships with corresponding *A. thaliana* and landmark MYB proteins.

### **Expression analysis from RNA-seq data**

RNA-Seq data sets were retrieved from the Sequence Read Archive (<https://www.ncbi.nlm.nih.gov/sra>) via fastq-dump v2.9.6 (<https://github.com/ncbi/sra-tools>) (Additional Table 2). STAR v2.5.1b (Dobin et al. 2013) was applied for the mapping of reads to the Pahang v2 reference genome sequence (Martin et al. 2016) using previously described parameters (Haak et al. 2018). featureCounts (Liao et al. 2014) was applied for quantification of the mapped reads per gene based on the Pahang v2 annotation. Previously developed Python scripts were deployed for the calculation of normalized expression values (<https://github.com/bpucker/bananaMYB>) (Haak et al. 2018).

## Results and Discussion

The first annotated reference genome sequence of *M. acuminata* (A genome) has become available in 2012 (D'Hont et al. 2012). It has been obtained from a double haploid (DH) plant of the Pahang cultivar (named after the Malaysia's Pahang province where it was collected), derived through haploid pollen and spontaneous chromosomes doubling from the wild subspecies *Musa acuminata* ssp. *malaccensis* (D'Hont et al. 2012). This wild subspecies was involved in the domestication of the vast majority of cultivated bananas and its genetic signature is commonly found in dessert and cooking bananas (ProMusa, <http://www.promusa.org>). An improved version (DH-Pahang version 2) of the genome assembly and annotation has been presented in 2016 comprising 450.7 Mb (86% of the estimated size) from which 89.5% are assigned to one of the 11 chromosomes, predicted to contain 35,276 protein encoding genes (Martin et al. 2016). This *M. acuminata* DH-Pahang version 2 genome sequence provides the platform of this study.

### Identification and genomic distribution of *M. acuminata* MYB genes

A consensus R2R3-MYB DNA binding domain sequence (deduced from Arabidopsis, grape and sugarbeet R2R3-MYBs, Additional Table1) was used as protein query in tBLASTn searches on the DH-Pahang version 2 genome sequence to comprehensively identify MYB protein coding genes in *M. acuminata*. The resulting putative MYB sequences were proven to map to unique loci in the genome and were confirmed to contain an intact MYB domain. This ensured that the gene models contained two or more (multiple) MYB repeats. We identified a set of 286 R2R3-MYB proteins and nine multiple repeat MYB proteins distantly related to the typical R2R3-MYB proteins: six R1R2R3-MYB (MYB3R) proteins, two MYB4R proteins and one CDC5-like protein from the *M. acuminata* genome sequence (Table 1).

*M. acuminata* MYB family

**Table 1: List of annotated MYB genes in the *Musa acuminata* (DH Pahang) genome sequence.**

The genes are ordered by DH Pahang version 2 (Martin et al. 2016) pseudochromosomes, from north to south. The annotation-version specific gene code describing the chromosomal assignment and position on pseudochromosomes is given in the first column. "Ma00" indicates genes located in sequences without chromosomal assignment. Functional assignment is based on the Maximum Likelihood tree presented in Figure 2. str.: strand, \*: paralogs, ASR: abiotic stress response, PP: phenylpropanoid, <sup>[1]</sup> Tak et al. 2017, <sup>[2]</sup> Negi et al. 2015, <sup>[3]</sup> Fan et al. 2018, <sup>[4]</sup> Yang et al. 2015.

| gene ID     | synonym                  | pseudochr. from | position to | str. | BHLH motif | coding exons | peptide length | MYB type | functional assignment               |
|-------------|--------------------------|-----------------|-------------|------|------------|--------------|----------------|----------|-------------------------------------|
| Ma01_g00440 |                          | 313923          | 315583      | -    |            | 1            | 297            | R2R3     | stress response, hormone signaling  |
| Ma01_g02850 | MusaMYB31 <sup>[1]</sup> | 1866276         | 1867435     | +    | +          | 2            | 200            | R2R3     | repressors PP, sinapate, lignin     |
| Ma01_g04470 |                          | 3004971         | 3006821     | +    |            | 3            | 230            | R2R3     | ASR, flower morphogenesis, stilbene |
| Ma01_g10440 |                          | 7520585         | 7526901     | +    |            | 3            | 586            | R2R3     | anther development, stress response |
| Ma01_g10750 |                          | 7722630         | 7723879     | -    |            | 3            | 273            | R2R3     | photomorphogenesis                  |
| Ma01_g11890 |                          | 8618960         | 8620447     | +    |            | 2            | 234            | R2R3     | secondary cell wall, lignin         |
| Ma01_g12250 |                          | 8869343         | 8871737     | -    |            | 3            | 334            | R2R3     |                                     |
| Ma01_g14370 |                          | 10499468        | 10501015    | +    |            | 3            | 195            | R2R3     | defense, stress response            |
| Ma01_g15800 |                          | 11477431        | 11479333    | +    |            | 3            | 197            | R2R3     | secondary cell wall, lignin         |
| Ma01_g16960 |                          | 12408973        | 12410679    | +    |            | 3            | 293            | R2R3     |                                     |
| Ma01_g17260 |                          | 12621562        | 12624265    | -    |            | 3            | 360            | R2R3     |                                     |
| Ma01_g17450 |                          | 12782326        | 12783615    | +    |            | 3            | 270            | R2R3     | defense, stress response            |
| Ma01_g18470 |                          | 13704376        | 13705557    | -    |            | 3            | 330            | R2R3     | suberin                             |
| Ma01_g19610 | MYB32 <sup>[2]</sup>     | 15270989        | 15272451    | -    | +          | 2            | 241            | R2R3     | repressors PP, sinapate, lignin     |
| Ma01_g19960 |                          | 15935559        | 15937046    | -    |            | 1            | 282            | R2R3     | stress response, hormone signaling  |
| Ma01_g21340 |                          | 20977295        | 20978433    | -    |            | 3            | 196            | R2R3     | stamen development                  |
| Ma02_g00280 |                          | 2701936         | 2703155     | +    |            | 3            | 281            | R2R3     | defense, stress response            |
| Ma02_g00290 |                          | 4086418         | 4089233     | +    |            | 3            | 320            | R2R3     | flavonols, phlobaphene              |
| Ma02_g03780 |                          | 15236704        | 15238133    | +    |            | 3            | 307            | R2R3     | mucilage, lignin, stomatal closure  |
| Ma02_g04860 |                          | 16268774        | 16270113    | +    |            | 3            | 325            | R2R3     |                                     |
| Ma02_g05880 |                          | 17024271        | 17029698    | -    |            | 7            | 489            | 3R       | cell cycle control                  |
| Ma02_g06190 |                          | 17224931        | 17226388    | +    |            | 3            | 301            | R2R3     | axillary meristem, root growth      |
| Ma02_g06670 |                          | 17595310        | 17597055    | +    |            | 3            | 317            | R2R3     | suberin                             |
| Ma02_g09720 | MYB46 <sup>[2]</sup>     | 19581503        | 19582589    | +    |            | 2            | 297            | R2R3     | secondary wall, lignin              |
| Ma02_g09870 |                          | 19644772        | 19647000    | -    |            | 3            | 381            | R2R3     |                                     |
| Ma02_g13370 |                          | 21804465        | 21806215    | +    |            | 3            | 308            | R2R3     | photomorphogenesis                  |
| Ma02_g15770 |                          | 23338151        | 23340844    | -    |            | 3            | 444            | R2R3     | anther development, stress response |
| Ma02_g16570 |                          | 23869343        | 23870392    | +    |            | 3            | 297            | R2R3     | root development                    |



*M. acuminata* MYB family

|               |                      |          |          |   |   |    |      |      |                                                |
|---------------|----------------------|----------|----------|---|---|----|------|------|------------------------------------------------|
| Ma02_g17950   | MYB48 <sup>[2]</sup> | 24668074 | 24669369 | - |   | 3  | 205  | R2R3 |                                                |
| Ma02_g19650   |                      | 25862200 | 25864721 | + | + | 3  | 258  | R2R3 |                                                |
| Ma02_g19770   | MYB63 <sup>[2]</sup> | 25962423 | 25963930 | - |   | 3  | 303  | R2R3 | PP, lignin                                     |
| Ma02_g20270   |                      | 26305416 | 26308011 | + |   | 3  | 365  | R2R3 |                                                |
| Ma02_g21230   |                      | 26925164 | 26926280 | + |   | 2  | 244  | R2R3 | general flavonoid, trichome                    |
| Ma02_g21760   |                      | 27303352 | 27318151 | - |   | 11 | 1076 | 3R   | cell cycle control                             |
| Ma02_g22540   |                      | 27850957 | 27852253 | + |   | 3  | 175  | R2R3 | repressors PP, sinapate, lignin                |
| Ma02_g23870   |                      | 28706468 | 28707735 | + |   | 3  | 253  | R2R3 | defense, stress response                       |
| Ma02_g24520   |                      | 29095023 | 29096192 | - |   | 3  | 292  | R2R3 | defense, stress response                       |
| Ma03_g01260   |                      | 944639   | 946045   | + |   | 3  | 124  | R2R3 | defense, stress response                       |
| Ma03_g06410   |                      | 4438151  | 4439467  | - |   | 3  | 287  | R2R3 | root development                               |
| Ma03_g07620   |                      | 5357785  | 5358916  | - |   | 3  | 205  | R2R3 |                                                |
| Ma03_g07840 * |                      | 5566056  | 5567272  | - | + | 3  | 282  | R2R3 | proanthocyanidins                              |
| Ma03_g07850 * |                      | 5573615  | 5574872  | + | + | 3  | 238  | R2R3 | proanthocyanidins                              |
| Ma03_g08300   |                      | 5984884  | 5986166  | - |   | 3  | 287  | R2R3 | defense, stress response                       |
| Ma03_g08930   |                      | 6570843  | 6573022  | + |   | 3  | 360  | R2R3 | embryogenesis, seed maturation                 |
| Ma03_g09310   |                      | 6861251  | 6862614  | + |   | 3  | 289  | R2R3 | defense, stress response                       |
| Ma03_g09340   |                      | 6900527  | 6902243  | + |   | 3  | 319  | R2R3 | cell wall, lignin, seed oil, axillary meristem |
| Ma03_g09840   |                      | 7294462  | 7296176  | + |   | 3  | 320  | R2R3 | anther-, tapetum development                   |
| Ma03_g11910   |                      | 9246252  | 9248138  | + |   | 3  | 360  | R2R3 |                                                |
| Ma03_g12480   |                      | 9622470  | 9625578  | - |   | 4  | 175  | R2R3 | defense, stress response                       |
| Ma03_g12720   |                      | 9782618  | 9784261  | - |   | 1  | 290  | R2R3 | stress response, hormone signaling             |
| Ma03_g14020   |                      | 11197595 | 11199013 | - |   | 3  | 313  | R2R3 | suberin                                        |
| Ma03_g18410   |                      | 23945756 | 23946927 | + |   | 2  | 168  | R2R3 | cell wall, lignin, seed oil, axillary meristem |
| Ma03_g19810   |                      | 25073643 | 25074748 | + |   | 2  | 259  | R2R3 | cell wall, lignin, seed oil, axillary meristem |
| Ma03_g20390   |                      | 25556441 | 25558664 | - |   | 3  | 382  | R2R3 | embryogenesis, seed maturation                 |
| Ma03_g21920   |                      | 26789930 | 26791072 | + | + | 3  | 254  | R2R3 | flavonoid repressor                            |
| Ma03_g21970   |                      | 26827699 | 26828820 | + |   | 3  | 303  | R2R3 |                                                |
| Ma03_g23170   |                      | 27799296 | 27800913 | - | + | 3  | 217  | R2R3 | repressors PP, sinapate, lignin                |
| Ma03_g25780   |                      | 29742482 | 29744122 | + |   | 3  | 344  | R2R3 | mucilage, lignin, stomatal closure             |
| Ma03_g28720   |                      | 31825467 | 31827667 | + | + | 3  | 274  | R2R3 | proanthocyanidins                              |
| Ma03_g29070   |                      | 32109705 | 32110872 | - |   | 3  | 325  | R2R3 |                                                |
| Ma03_g29510   |                      | 32402433 | 32403599 | - |   | 1  | 288  | R2R3 | stress response, hormone signaling             |
| Ma03_g29770   |                      | 32613488 | 32614916 | + |   | 3  | 307  | R2R3 |                                                |
| Ma04_g00460   |                      | 405117   | 406515   | + |   | 3  | 265  | R2R3 | defense, stress response                       |
| Ma04_g01010   |                      | 896344   | 897266   | - |   | 3  | 226  | R2R3 |                                                |
| Ma04_g05460   |                      | 4086523  | 4089539  | + |   | 4  | 290  | R2R3 | photomorphogenesis                             |
| Ma04_g06410   |                      | 4737137  | 4738569  | + |   | 3  | 306  | R2R3 |                                                |

*M. acuminata* MYB family

|             |                      |          |          |     |   |     |      |                                     |
|-------------|----------------------|----------|----------|-----|---|-----|------|-------------------------------------|
| Ma04_g09430 |                      | 6706206  | 6707827  | +   | 1 | 302 | R2R3 | stress response, hormone signaling  |
| Ma04_g11930 |                      | 8517172  | 8518919  | +   | 3 | 246 | R2R3 | photomorphogenesis                  |
| Ma04_g12940 |                      | 9788762  | 9790485  | +   | 1 | 266 | R2R3 | stress response, hormone signaling  |
| Ma04_g13260 |                      | 10044518 | 10045599 | +   | 3 | 308 | R2R3 |                                     |
| Ma04_g16770 |                      | 16592801 | 16594124 | -   | 3 | 348 | R2R3 | suberin                             |
| Ma04_g18740 |                      | 20887851 | 20889334 | +   | 3 | 146 | R2R3 | ASR, flower morphogenesis, stilbene |
| Ma04_g19500 |                      | 22140557 | 22142266 | +   | 3 | 347 | R2R3 | suberin                             |
| Ma04_g20120 |                      | 22833446 | 22834622 | +   | 3 | 322 | R2R3 | anther development, stress response |
| Ma04_g22200 |                      | 24575736 | 24576706 | -   | 2 | 195 | R2R3 | repressors PP, sinapate, lignin     |
| Ma04_g22930 |                      | 25119938 | 25121516 | -   | 3 | 254 | R2R3 | axillary meristem, root growth      |
| Ma04_g23220 |                      | 25400377 | 25401463 | -   | 3 | 243 | R2R3 | PP, lignin                          |
| Ma04_g24670 |                      | 26638956 | 26640374 | +   | 3 | 243 | R2R3 |                                     |
| Ma04_g26220 |                      | 27753147 | 27754781 | +   | 3 | 283 | R2R3 |                                     |
| Ma04_g26550 | MYB85 <sup>[2]</sup> | 27973129 | 27974181 | -   | 2 | 249 | R2R3 | secondary cell wall, lignin         |
| Ma04_g26660 |                      | 28040878 | 28042092 | -   | 3 | 128 | R2R3 | defense, stress response            |
| Ma04_g26810 |                      | 28140431 | 28141878 | -   | 1 | 269 | R2R3 | stress response, hormone signaling  |
| Ma04_g28300 |                      | 29374641 | 29376644 | - + | 3 | 232 | R2R3 |                                     |
| Ma04_g28510 |                      | 29563724 | 29565208 | +   | 3 | 219 | R2R3 | ASR, flower morphogenesis, stilbene |
| Ma04_g30160 |                      | 30889022 | 30891484 | -   | 3 | 368 | R2R3 | anther development, stress response |
| Ma04_g31800 |                      | 32024735 | 32025860 | +   | 3 | 279 | R2R3 | axillary meristem, root growth      |
| Ma04_g31880 |                      | 32082474 | 32084373 | -   | 3 | 142 | R2R3 | photomorphogenesis                  |
| Ma04_g32240 |                      | 32306362 | 32307006 | +   | 2 | 192 | R2R3 | repressors PP, sinapate, lignin     |
| Ma04_g33920 | MYB72 <sup>[2]</sup> | 33328174 | 33329487 | +   | 3 | 300 | R2R3 | PP, lignin                          |
| Ma04_g34300 |                      | 33574944 | 33576372 | +   | 3 | 382 | R2R3 | anther development, stress response |
| Ma04_g34660 |                      | 33734710 | 33735657 | +   | 3 | 226 | R2R3 | axillary meristem, root growth      |
| Ma04_g35350 |                      | 34164151 | 34165124 | -   | 3 | 281 | R2R3 | PP, lignin                          |
| Ma04_g35730 |                      | 34354754 | 34362279 | +   | 4 | 204 | R2R3 | PP, lignin                          |
| Ma04_g35890 |                      | 34456195 | 34457741 | -   | 3 | 279 | R2R3 | photomorphogenesis                  |
| Ma04_g38740 |                      | 36138963 | 36140410 | +   | 3 | 279 | R2R3 | axillary meristem, root growth      |
| Ma05_g01100 |                      | 651244   | 652185   | +   | 3 | 206 | R2R3 | repressors PP, sinapate, lignin     |
| Ma05_g01880 |                      | 1152994  | 1154327  | -   | 3 | 281 | R2R3 | axillary meristem, root growth      |
| Ma05_g03340 |                      | 2404252  | 2405715  | +   | 3 | 303 | R2R3 | PP, lignin                          |
| Ma05_g03690 |                      | 2718181  | 2719844  | -   | 3 | 240 | R2R3 | ASR, flower morphogenesis, stilbene |
| Ma05_g05670 |                      | 4316913  | 4318043  | -   | 3 | 246 | R2R3 | secondary cell wall, lignin         |
| Ma05_g06310 |                      | 4706038  | 4707394  | - + | 2 | 375 | R2R3 | general flavonoid, trichome         |
| Ma05_g07140 |                      | 5206984  | 5207790  | -   | 1 | 269 | R2R3 | stress tolerance                    |
| Ma05_g07450 |                      | 5428289  | 5429962  | -   | 3 | 295 | R2R3 | defense, stress response            |
| Ma05_g08960 |                      | 6598602  | 6600986  | +   | 3 | 192 | R2R3 |                                     |



*M. acuminata* MYB family

|             |                       |          |          |   |   |    |     |      |                                                |
|-------------|-----------------------|----------|----------|---|---|----|-----|------|------------------------------------------------|
| Ma05_g10430 |                       | 7526267  | 7527710  | + |   | 3  | 279 | R2R3 | axillary meristem, root growth                 |
| Ma05_g12030 |                       | 8749406  | 8751293  | + |   | 3  | 255 | R2R3 | flower meristem identity                       |
| Ma05_g14510 |                       | 10595097 | 10596227 | - |   | 3  | 229 | R2R3 | ASR, flower morphogenesis, stilbene            |
| Ma05_g17720 |                       | 21202263 | 21203407 | - |   | 3  | 234 | R2R3 |                                                |
| Ma05_g18420 |                       | 23864457 | 23865647 | + |   | 3  | 241 | R2R3 | repressors PP, sinapate, lignin                |
| Ma05_g18710 |                       | 24607776 | 24609429 | - |   | 3  | 288 | R2R3 | defense, stress response                       |
| Ma05_g19630 |                       | 28141902 | 28143134 | - |   | 3  | 295 | R2R3 | root development                               |
| Ma05_g20320 |                       | 31975488 | 31976981 | + |   | 3  | 307 | R2R3 | suberin                                        |
| Ma05_g20740 |                       | 32405856 | 32407834 | + |   | 3  | 375 | R2R3 |                                                |
| Ma05_g20940 |                       | 32642123 | 32643636 | + |   | 3  | 333 | R2R3 |                                                |
| Ma05_g23480 |                       | 35547417 | 35548389 | + |   | 3  | 182 | R2R3 | defense, stress response                       |
| Ma05_g23640 |                       | 35794588 | 35797244 | - |   | 3  | 321 | R2R3 | flavonols, phlobaphene                         |
| Ma05_g24200 |                       | 36482627 | 36483579 | + |   | 3  | 207 | R2R3 | axillary meristem, root growth                 |
| Ma05_g24840 |                       | 36981509 | 36982629 | + |   | 3  | 323 | R2R3 | anther-, tapetum development                   |
| Ma05_g25150 |                       | 37166044 | 37167618 | + |   | 3  | 316 | R2R3 | axillary meristem, root growth                 |
| Ma05_g25490 |                       | 37422954 | 37423941 | - |   | 3  | 226 | R2R3 | secondary cell wall, lignin                    |
| Ma05_g25630 |                       | 37499737 | 37501266 | - |   | 3  | 290 | R2R3 | trichome branching, petal morphogenesis        |
| Ma05_g25680 |                       | 37532195 | 37533810 | + |   | 3  | 302 | R2R3 | cell wall, lignin, seed oil, axillary meristem |
| Ma05_g28370 |                       | 39401272 | 39403071 | - | + | 3  | 210 | R2R3 | repressors PP, sinapate, lignin                |
| Ma05_g30120 |                       | 40637050 | 40638724 | + |   | 3  | 252 | R2R3 | cell wall, lignin, seed oil, axillary meristem |
| Ma05_g30720 |                       | 40993150 | 40994479 | + |   | 3  | 237 | R2R3 | cell cycle regulation                          |
| Ma05_g31160 |                       | 41198403 | 41202707 | - |   | 2  | 397 | R2R3 | stress tolerance                               |
| Ma05_g31440 |                       | 41356205 | 41357951 | + |   | 1  | 344 | R2R3 | leaf-, shoot-, germ morphogenesis              |
| Ma06_g00910 |                       | 745494   | 747844   | + |   | 4  | 394 | R2R3 | cell wall, lignin, seed oil, axillary meristem |
| Ma06_g03570 |                       | 2604323  | 2605964  | + |   | 3  | 333 | R2R3 | axillary meristem, root growth                 |
| Ma06_g04210 |                       | 3057847  | 3059452  | - | + | 3  | 361 | R2R3 | proanthocyanidins                              |
| Ma06_g04240 |                       | 3073024  | 3074684  | - |   | 3  | 345 | R2R3 | trichome branching, petal morphogenesis        |
| Ma06_g04270 |                       | 3094694  | 3096881  | + |   | 3  | 354 | R2R3 | cell wall, lignin, seed oil, axillary meristem |
| Ma06_g04370 |                       | 3152384  | 3153807  | + |   | 3  | 250 | R2R3 | defense, stress response                       |
| Ma06_g05680 |                       | 4227417  | 4228614  | + |   | 3  | 305 | R2R3 | root development                               |
| Ma06_g05960 |                       | 4396733  | 4397886  | - | + | 3  | 275 | R2R3 | anthocyanins                                   |
| Ma06_g06660 |                       | 4800702  | 4808542  | - |   | 7  | 517 | 3R   | cell cycle control                             |
| Ma06_g08100 |                       | 5748553  | 5749986  | + |   | 3  | 276 | R2R3 | embryogenesis, seed maturation                 |
| Ma06_g08440 |                       | 5976662  | 5977609  | - |   | 3  | 243 | R2R3 |                                                |
| Ma06_g08910 |                       | 6239004  | 6240845  | + | + | 3  | 199 | R2R3 | repressors PP, sinapate, lignin                |
| Ma06_g11140 | MaMYB3 <sup>[3]</sup> | 7827947  | 7829034  | + | + | 3  | 200 | R2R3 | starch degradation, flavonoid repressor        |
| Ma06_g11270 |                       | 7905151  | 7906898  | + |   | 3  | 308 | R2R3 | defense, stress response                       |
| Ma06_g12110 |                       | 8407734  | 8411775  | - |   | 12 | 469 | R2R3 | guard cell division, root gravitropism         |

*M. acuminata* MYB family

|               |          |          |   |   |    |      |      |                                                |
|---------------|----------|----------|---|---|----|------|------|------------------------------------------------|
| Ma06_g12160   | 8449752  | 8451062  | - |   | 3  | 256  | R2R3 | defense, stress response                       |
| Ma06_g14470   | 9916014  | 9917324  | - | + | 3  | 286  | R2R3 | repressors PP, sinapate, lignin                |
| Ma06_g16350   | 11053372 | 11054799 | + | + | 2  | 290  | R2R3 | general flavonoid, trichome                    |
| Ma06_g16920   | 11470718 | 11471708 | + |   | 3  | 220  | R2R3 | cell cycle regulation                          |
| Ma06_g17440   | 11851409 | 11852643 | - |   | 3  | 275  | R2R3 | cell wall, lignin, seed oil, axillary meristem |
| Ma06_g19030   | 13020068 | 13021561 | + |   | 2  | 263  | R2R3 | cell wall, lignin, seed oil, axillary meristem |
| Ma06_g27210   | 29243106 | 29244308 | - |   | 3  | 237  | R2R3 | repressors PP, sinapate, lignin                |
| Ma06_g29060   | 30553182 | 30554508 | + |   | 3  | 195  | R2R3 | stamen development                             |
| Ma06_g31020   | 32236972 | 32238507 | + |   | 3  | 351  | R2R3 | defense, stress response                       |
| Ma06_g32530   | 33447706 | 33449189 | + |   | 3  | 315  | R2R3 | axillary meristem, root growth                 |
| Ma06_g33100   | 33858221 | 33872663 | + |   | 12 | 838  | 4R   | SNAP complex                                   |
| Ma06_g33190   | 33914323 | 33915299 | + |   | 3  | 244  | R2R3 |                                                |
| Ma06_g33430 * | 34072591 | 34074225 | + |   | 3  | 399  | R2R3 | axillary meristem, root growth                 |
| Ma06_g33440 * | 34079035 | 34083709 | + |   | 2  | 335  | R2R3 | axillary meristem, root growth                 |
| Ma06_g33920   | 34371133 | 34372942 | + |   | 3  | 346  | R2R3 | cell wall, lignin, seed oil, axillary meristem |
| Ma06_g35430   | 35258465 | 35260108 | + |   | 1  | 225  | R2R3 | stress tolerance                               |
| Ma06_g35620   | 35399156 | 35400631 | + |   | 4  | 400  | R2R3 | embryogenesis, seed maturation                 |
| Ma06_g37660   | 36662931 | 36664139 | + |   | 3  | 299  | R2R3 | anther-, trichome development                  |
| Ma06_g38880   | 37506759 | 37508514 | - |   | 3  | 311  | R2R3 | anther-, trichome development                  |
| Ma07_g00270   | 249167   | 250371   | + |   | 2  | 326  | R2R3 |                                                |
| Ma07_g02470   | 1968475  | 1973718  | - |   | 3  | 600  | R2R3 | anther development, stress response            |
| Ma07_g05660   | 4115493  | 4116032  | + |   | 1  | 272  | R2R3 | defense, stress response                       |
| Ma07_g05780   | 4199983  | 4201888  | + |   | 2  | 251  | R2R3 | secondary cell wall, lignin                    |
| Ma07_g08110   | 6059901  | 6061028  | + |   | 3  | 256  | R2R3 | axillary meristem, root growth                 |
| Ma07_g10330   | 7698294  | 7710182  | + |   | 7  | 568  | 3R   | cell cycle control                             |
| Ma07_g10340   | 7710102  | 7712664  | - |   | 1  | 332  | R2R3 | leaf-, shoot-, germ morphogenesis              |
| Ma07_g11110   | 8262980  | 8264078  | - |   | 3  | 1286 | R2R3 | cell wall, lignin, seed oil, axillary meristem |
| Ma07_g12330   | 9212596  | 9214045  | + |   | 3  | 272  | R2R3 | secondary cell wall, lignin                    |
| Ma07_g13590   | 10215552 | 10217192 | - | + | 2  | 307  | R2R3 | general flavonoid, trichome                    |
| Ma07_g17600   | 20758827 | 20760547 | + |   | 3  | 343  | R2R3 |                                                |
| Ma07_g19350   | 27376391 | 27377767 | - |   | 3  | 270  | R2R3 | defense, stress response                       |
| Ma07_g19470   | 27474531 | 27475523 | + |   | 3  | 241  | R2R3 | cell cycle regulation                          |
| Ma07_g19700   | 27655370 | 27656957 | - |   | 3  | 470  | R2R3 | cell wall, lignin, seed oil, axillary meristem |
| Ma07_g19720   | 27682847 | 27684927 | + |   | 3  | 357  | R2R3 | trichome branching, petal morphogenesis        |
| Ma07_g19880 * | 27793461 | 27794847 | + | + | 3  | 264  | R2R3 | proanthocyanidins                              |
| Ma07_g19890 * | 27798123 | 27799369 | - | + | 3  | 269  | R2R3 | proanthocyanidins                              |
| Ma07_g20020   | 27925622 | 27926695 | + |   | 4  | 270  | R2R3 | secondary cell wall, lignin                    |
| Ma07_g20990   | 28973981 | 28975550 | - |   | 3  | 341  | R2R3 | axillary meristem, root growth                 |

*M. acuminata* MYB family

|               |                      |          |          |   |   |   |      |      |                                                |
|---------------|----------------------|----------|----------|---|---|---|------|------|------------------------------------------------|
| Ma07_g22540   |                      | 30450165 | 30451931 | - |   | 3 | 269  | R2R3 | defense, stress response                       |
| Ma07_g23060   |                      | 30808440 | 30823676 | + |   | 4 | 551  | R2R3 | anther development, stress response            |
| Ma07_g23180   |                      | 30931923 | 30933477 | + |   | 3 | 289  | R2R3 | defense, stress response                       |
| Ma07_g23230 * |                      | 30951474 | 30953174 | + | * | 3 | 274  | R2R3 | cell wall, lignin, seed oil, axillary meristem |
| Ma07_g23240 * |                      | 30953852 | 30959687 | + |   | 5 | 1124 | R2R3 | cell wall, lignin, seed oil, axillary meristem |
| Ma07_g26530   |                      | 33294249 | 33295626 | - |   | 3 | 292  | R2R3 |                                                |
| Ma08_g01300   |                      | 1210739  | 1212318  | - |   | 3 | 263  | R2R3 | defense, stress response                       |
| Ma08_g01760   |                      | 1466320  | 1467246  | + |   | 1 | 249  | R2R3 | stress tolerance                               |
| Ma08_g02100   |                      | 1707379  | 1708993  | + |   | 3 | 421  | R2R3 | embryogenesis, seed maturation                 |
| Ma08_g02450   |                      | 1904208  | 1906264  | + |   | 3 | 241  | R2R3 |                                                |
| Ma08_g03420   |                      | 2489605  | 2490995  | + |   | 3 | 319  | R2R3 | anther-, trichome development                  |
| Ma08_g10260   |                      | 7475666  | 7478250  | - |   | 3 | 371  | R2R3 | flavonols, phlobaphene                         |
| Ma08_g10600   |                      | 7758560  | 7759645  | - |   | 3 | 256  | R2R3 | defense, stress response                       |
| Ma08_g11120   |                      | 8204459  | 8205747  | + |   | 3 | 278  | R2R3 | photomorphogenesis                             |
| Ma08_g12510   |                      | 9469637  | 9470606  | + |   | 3 | 231  | R2R3 | PP, lignin                                     |
| Ma08_g13070   |                      | 10389004 | 10390770 | - |   | 3 | 313  | R2R3 | axillary meristem, root growth                 |
| Ma08_g14720   |                      | 14652239 | 14654273 | + |   | 3 | 370  | R2R3 |                                                |
| Ma08_g15820   |                      | 16034463 | 16037767 | - | + | 3 | 260  | R2R3 |                                                |
| Ma08_g15960   |                      | 16625932 | 16636910 | - |   | 3 | 572  | R2R3 |                                                |
| Ma08_g16760   |                      | 20724394 | 20725390 | - | + | 3 | 194  | R2R3 | flavonoid repressor                            |
| Ma08_g17860   |                      | 27301469 | 27302427 | - |   | 3 | 249  | R2R3 | defense, stress response                       |
| Ma08_g18540   |                      | 32070622 | 32071809 | - |   | 4 | 276  | R2R3 | defense, stress response                       |
| Ma08_g23390   |                      | 36792752 | 36794121 | + |   | 3 | 290  | R2R3 | proanthocyanidins                              |
| Ma08_g25570   |                      | 38350574 | 38352398 | + |   | 3 | 307  | R2R3 | axillary meristem, root growth                 |
| Ma08_g25960   | MYBS3 <sup>[4]</sup> | 38629094 | 38631076 | + |   | 1 | 296  | R2R3 | stress response, hormone signaling             |
| Ma08_g26720   |                      | 39209905 | 39211361 | - |   | 3 | 541  | R2R3 |                                                |
| Ma08_g30360   |                      | 41652638 | 41653604 | + |   | 3 | 269  | R2R3 | defense, stress response                       |
| Ma08_g31720   | MYB83 <sup>[2]</sup> | 42548860 | 42549971 | + |   | 2 | 279  | R2R3 | secondary wall, lignin                         |
| Ma08_g32760   |                      | 43364665 | 43366044 | + |   | 3 | 200  | R2R3 | repressors PP, sinapate, lignin                |
| Ma08_g34230   |                      | 44310373 | 44311394 | - | + | 2 | 203  | R2R3 | repressors PP, sinapate, lignin                |
| Ma08_g34710   |                      | 44706406 | 44707610 | + |   | 3 | 245  | R2R3 |                                                |
| Ma09_g03310   |                      | 2240424  | 2242599  | - |   | 1 | 342  | R2R3 | leaf-, shoot-, germ morphogenesis              |
| Ma09_g03740   |                      | 2480875  | 2484428  | + |   | 2 | 322  | R2R3 | stress tolerance                               |
| Ma09_g04930   |                      | 3159017  | 3160626  | - |   | 3 | 302  | R2R3 | cell wall, lignin, seed oil, axillary meristem |
| Ma09_g06730   |                      | 4303577  | 4304528  | + |   | 3 | 204  | R2R3 | stamen development                             |
| Ma09_g08140   |                      | 5353765  | 5354763  | + |   | 2 | 256  | R2R3 | cell wall, lignin, seed oil, axillary meristem |
| Ma09_g08260   |                      | 5451761  | 5453265  | - | + | 3 | 272  | R2R3 | repressors PP, sinapate, lignin                |
| Ma09_g09400   |                      | 6192674  | 6193933  | - |   | 3 | 263  | R2R3 |                                                |

*M. acuminata* MYB family

|             |                      |          |          |     |    |      |      |                                                |
|-------------|----------------------|----------|----------|-----|----|------|------|------------------------------------------------|
| Ma09_g09720 |                      | 6397365  | 6410516  | -   | 13 | 798  | 4R   | SNAP complex                                   |
| Ma09_g10800 |                      | 7342785  | 7344298  | -   | 3  | 327  | R2R3 | anther-, trichome development                  |
| Ma09_g11770 |                      | 8000781  | 8002111  | -   | 3  | 262  | R2R3 | defense, stress response                       |
| Ma09_g13170 |                      | 8908572  | 8910010  | -   | 3  | 310  | R2R3 | axillary meristem, root growth                 |
| Ma09_g14260 |                      | 9744056  | 9745210  | -   | 3  | 187  | R2R3 | root development                               |
| Ma09_g15050 |                      | 10356702 | 10357805 | -   | 3  | 248  | R2R3 | secondary cell wall, lignin                    |
| Ma09_g15130 |                      | 10456782 | 10469060 | +   | 5  | 211  | R2R3 | cell wall, lignin, seed oil, axillary meristem |
| Ma09_g15440 |                      | 10764111 | 10765364 | -   | 3  | 257  | R2R3 | proanthocyanidins                              |
| Ma09_g15940 |                      | 11297144 | 11298342 | -   | 3  | 260  | R2R3 | defense, stress response                       |
| Ma09_g16940 |                      | 12437966 | 12439652 | +   | 3  | 279  | R2R3 | defense, stress response                       |
| Ma09_g16980 |                      | 12476466 | 12478547 | +   | 3  | 304  | R2R3 | cell wall, lignin, seed oil, axillary meristem |
| Ma09_g20280 |                      | 28997934 | 28999432 | +   | 3  | 273  | R2R3 | axillary meristem, root growth                 |
| Ma09_g22730 |                      | 34631674 | 34632781 | -   | 3  | 315  | R2R3 |                                                |
| Ma09_g23100 |                      | 35024297 | 35025651 | +   | 1  | 288  | R2R3 | stress response, hormone signaling             |
| Ma09_g23770 |                      | 35511400 | 35518711 | +   | 5  | 1120 | 2R   | CDC5                                           |
| Ma09_g24640 | MYB31 <sup>[2]</sup> | 36291635 | 36292658 | -   | 2  | 173  | R2R3 | repressors PP, sinapate, lignin                |
| Ma09_g25010 |                      | 36615281 | 36616548 | +   | 3  | 301  | R2R3 | defense, stress response                       |
| Ma09_g25590 |                      | 36999254 | 37000706 | -   | 3  | 315  | R2R3 | anther-, trichome development                  |
| Ma09_g27990 |                      | 38852455 | 38853644 | - + | 3  | 260  | R2R3 | anthocyanins                                   |
| Ma09_g28970 |                      | 39592459 | 39593487 | +   | 1  | 343  | R2R3 | leaf-, shoot-, germ morphogenesis              |
| Ma09_g29010 |                      | 39617312 | 39618287 | -   | 3  | 214  | R2R3 |                                                |
| Ma09_g29660 | MYB52 <sup>[2]</sup> | 40061201 | 40062117 | -   | 3  | 210  | R2R3 | cell wall, lignin, seed oil, axillary meristem |
| Ma10_g01730 |                      | 5102443  | 5104125  | -   | 3  | 286  | R2R3 | defense, stress response                       |
| Ma10_g01750 |                      | 5158925  | 5160589  | +   | 3  | 288  | R2R3 | defense, stress response                       |
| Ma10_g04420 |                      | 15095580 | 15096722 | -   | 3  | 284  | R2R3 |                                                |
| Ma10_g04920 |                      | 15562002 | 15563726 | -   | 3  | 321  | R2R3 | cell wall, lignin, seed oil, axillary meristem |
| Ma10_g05260 |                      | 15989100 | 15989831 | +   | 1  | 243  | R2R3 | stress tolerance                               |
| Ma10_g05680 |                      | 17016063 | 17017845 | +   | 3  | 499  | R2R3 | embryogenesis, seed maturation                 |
| Ma10_g06140 |                      | 17599985 | 17600776 | +   | 3  | 212  | R2R3 |                                                |
| Ma10_g09100 |                      | 23305076 | 23306673 | -   | 3  | 297  | R2R3 | anther-, trichome development                  |
| Ma10_g09370 |                      | 23565723 | 23566809 | -   | 3  | 268  | R2R3 | axillary meristem, root growth                 |
| Ma10_g10820 |                      | 24568694 | 24569501 | +   | 3  | 176  | R2R3 | repressors PP, sinapate, lignin                |
| Ma10_g11100 |                      | 24705798 | 24706830 | -   | 2  | 260  | R2R3 | cell wall, lignin, seed oil, axillary meristem |
| Ma10_g13000 |                      | 25941801 | 25943526 | +   | 3  | 304  | R2R3 | cell wall, lignin, seed oil, axillary meristem |
| Ma10_g13640 |                      | 26378268 | 26379297 | -   | 3  | 236  | R2R3 | cell cycle regulation                          |
| Ma10_g14150 |                      | 26690021 | 26691729 | - + | 2  | 298  | R2R3 | general flavonoid, trichome                    |
| Ma10_g14950 |                      | 27210210 | 27223227 | +   | 11 | 869  | 3R   | cell cycle control                             |
| Ma10_g16050 |                      | 27917256 | 27918773 | + + | 3  | 217  | R2R3 | repressors PP, sinapate, lignin                |

*M. acuminata* MYB family

|             |          |          |   |   |    |     |      |                                                |
|-------------|----------|----------|---|---|----|-----|------|------------------------------------------------|
| Ma10_g17650 | 28964249 | 28965577 | + | + | 3  | 278 | R2R3 | anthocyanins                                   |
| Ma10_g18840 | 29620788 | 29624706 | + |   | 12 | 467 | R2R3 | guard cell division, root gravitropism         |
| Ma10_g19130 | 29806295 | 29807639 | - |   | 3  | 297 | R2R3 | root development                               |
| Ma10_g19820 | 30233785 | 30235049 | - |   | 3  | 175 | R2R3 | defense, stress response                       |
| Ma10_g19970 | 30311359 | 30312430 | - | + | 3  | 206 | R2R3 | flavonoid repressor                            |
| Ma10_g24510 | 33076381 | 33078033 | - |   | 3  | 305 | R2R3 | root development                               |
| Ma10_g25660 | 33694709 | 33695874 | + |   | 3  | 319 | R2R3 | root development                               |
| Ma10_g26540 | 34187286 | 34196507 | + |   | 7  | 566 | 3R   | cell cycle control                             |
| Ma10_g26660 | 34247740 | 34248867 | + |   | 2  | 226 | R2R3 |                                                |
| Ma10_g29230 | 35877570 | 35878873 | - |   | 3  | 315 | R2R3 | defense, stress response                       |
| Ma10_g29290 | 35933157 | 35937337 | - |   | 3  | 386 | R2R3 | anther development, stress response            |
| Ma10_g29660 | 36170110 | 36171732 | - |   | 3  | 289 | R2R3 | trichome branching, petal morphogenesis        |
| Ma10_g29900 | 36334717 | 36336097 | + |   | 3  | 285 | R2R3 | secondary cell wall, lignin                    |
| Ma11_g00330 | 235199   | 236300   | - |   | 3  | 235 | R2R3 |                                                |
| Ma11_g00350 | 255253   | 257212   | + |   | 3  | 375 | R2R3 |                                                |
| Ma11_g02310 | 1659706  | 1660645  | - |   | 3  | 213 | R2R3 | PP, lignin                                     |
| Ma11_g03860 | 2954679  | 2956968  | - |   | 3  | 294 | R2R3 | flower meristem identity                       |
| Ma11_g04680 | 3650617  | 3651708  | + |   | 3  | 264 | R2R3 | defense, stress response                       |
| Ma11_g06880 | 5504819  | 5505826  | - |   | 2  | 167 | R2R3 | repressors PP, sinapate, lignin                |
| Ma11_g07330 | 5826847  | 5827933  | + |   | 3  | 261 | R2R3 | axillary meristem, root growth                 |
| Ma11_g07530 | 6014287  | 6015836  | - |   | 3  | 319 | R2R3 | suberin                                        |
| Ma11_g08730 | 6941295  | 6943798  | - |   | 3  | 275 | R2R3 | cell wall, lignin, seed oil, axillary meristem |
| Ma11_g10680 | 10271323 | 10272648 | - |   | 3  | 275 | R2R3 | defense, stress response                       |
| Ma11_g10710 | 10304401 | 10305535 | + |   | 3  | 275 | R2R3 |                                                |
| Ma11_g11300 | 12744754 | 12745994 | + |   | 3  | 251 | R2R3 | defense, stress response                       |
| Ma11_g11940 | 15469297 | 15470702 | - |   | 3  | 315 | R2R3 | defense, stress response                       |
| Ma11_g14670 | 20385599 | 20386631 | - |   | 3  | 262 | R2R3 | defense, stress response                       |
| Ma11_g15740 | 21412142 | 21413141 | - |   | 3  | 230 | R2R3 | PP, lignin                                     |
| Ma11_g16150 | 21712282 | 21713968 | - |   | 3  | 233 | R2R3 |                                                |
| Ma11_g16430 | 21944276 | 21945346 | + |   | 3  | 287 | R2R3 | PP, lignin                                     |
| Ma11_g19220 | 24164773 | 24166212 | - |   | 3  | 344 | R2R3 | defense, stress response                       |
| Ma11_g21160 | 25411481 | 25412732 | - |   | 3  | 303 | R2R3 |                                                |
| Ma11_g21730 | 25754193 | 25755462 | - |   | 3  | 326 | R2R3 | suberin                                        |
| Ma11_g21820 | 25812612 | 25817014 | - | + | 3  | 235 | R2R3 |                                                |
| Ma11_g23010 | 26544673 | 26545555 | - |   | 2  | 241 | R2R3 | cell cycle regulation                          |
| Ma11_g23420 | 26767577 | 26769029 | + |   | 3  | 183 | R2R3 | cell wall, lignin, seed oil, axillary meristem |
| Ma00_g01590 | 9744102  | 9745946  | + |   | 1  | 283 | R2R3 | stress response, hormone signaling             |
| Ma00_g04340 | 36355056 | 36356431 | + |   | 2  | 283 | R2R3 | secondary wall, lignin                         |

*M. acuminata* MYB family

Ma00\_g04960 43098831 43099818 - 3 267 R2R3 defense, stress response

181

182 The number of R2R3-MYB genes is one of the highest among the species that have been

183 studied to date, ranging from 45 in *Ginkgo biloba* (Liu et al. 2017) over 157 in *Zea mays* (Du

184 et al. 2012a) and 249 in *Brassica napus* (Hajiebrahimi et al. 2017) to 360 in *Gossypium*

185 *hirsutum* (Salih et al. 2016). This is probably due to three whole-genome duplications

186 ( $\gamma$  100 Myr ago and  $\alpha$ ,  $\beta$  65 Myr ago) that occurred during *Musa* genome evolution (D'Hont et

187 al. 2012; Wu et al. 2016). The number of atypical multiple repeat *MYB* genes identified in

188 *M. acuminata* is in the same range as those reported for most other plant species, with for

189 example up to six *MYB3R* and up to two *MYB4R* and *CDC5*-like genes.

190 The identified 286 *MaR2R3-MYB* genes, constituting approximately 0.81 % of the 35,276

191 predicted protein-coding *M. acuminata* genes and 9.1 % of the 3,155 putative *M. acuminata*

192 transcription factor genes (Martin et al. 2016), were subjected to further analyses. The

193 identified *MaR2R3-MYB* genes were named following the nomenclature of the locus tags

194 provided in the DH-Pahang version 2 genome annotation (Table 1). A keyword search in the

195 NCBI database (<http://www.ncbi.nlm.nih.gov/>) revealed no evidence for *M. acuminata* *MYB*

196 genes not present in Table 1.

197 Six publications dealing with *M. acuminata* *MYB* genes were identified: one study describes

198 the elevated expression of nine *MaMYB* genes in transgenic banana plants overexpressing the

199 NAC domain transcription factor *MusaVND1* (vascular related NAC domain) indicating a

200 role of these MaMYBs in the regulation of secondary wall deposition (Negi et al. 2015).

201 *MYBS3* (*Ma08\_25960*) was found to be differentially expressed between cold-sensitive and

202 cold-tolerant bananas (Yang et al. 2015). Another publication described the *M. acuminata*

203 *R2R3-MYB* gene *Ma05\_03690* being upregulated in the early response to the endoparasitic

204 root-knot nematode *Meloidogyne incognita* in roots (Castañeda et al. 2017). *MusaMYB31*

205 (*Ma01\_02850*) was identified as a negative regulator of lignin biosynthesis and the general

206 phenylpropanoid biosynthesis pathway (Tak et al. 2017). *MaMYB3* (*Ma06\_11140*) was found

207 to repress starch degradation in fruit ripening (Fan et al. 2018) and *MaMYB4* (*Ma01\_19610*)

208 was recently described to control fatty acid desaturation (Song et al. 2019).

209 On the basis of the DH-Pahang version 2 annotation, 292 of the 295 *MaMYB* genes could be

210 assigned to the eleven chromosomes. The chromosomal distribution of *MaMYB* genes on the

211 pseudochromosomes is shown in Figure 1 and revealed that *M. acuminata* *MYB* genes are

212 distributed across all chromosomes.



# *M. acuminata* MYB family

Gene structure analysis revealed that most *MaR2R3-MYB* genes (226 of 286; 79 %) follow the previously reported rule of having two introns and three exons, and display the highly conserved splicing arrangement that has also been reported for other plant species (Du et al. 2012a; Du et al. 2012b; Stracke et al. 2014). A total of 29 (10.1 %) *MaR2R3-MYB* genes have two exons and 19 (6.6 %) were one exon genes. Eight (2.8 %) *MaR2R3-MYB* genes have four exons, and there are two of each kind with five or twelve exons, respectively. The complex exon-intron structure of Ma06\_12110 and Ma10\_18840 is known from their *A. thaliana* orthologs AtMYB88 and AtMYB124/FOUR LIPS (FLP) containing ten and eleven exons, respectively. This supports their close evolutionary relationship, but also indicates the conservation of this intron pattern in evolution since the monocot-dicot split 140-150 Myr ago (Chaw et al. 2004).

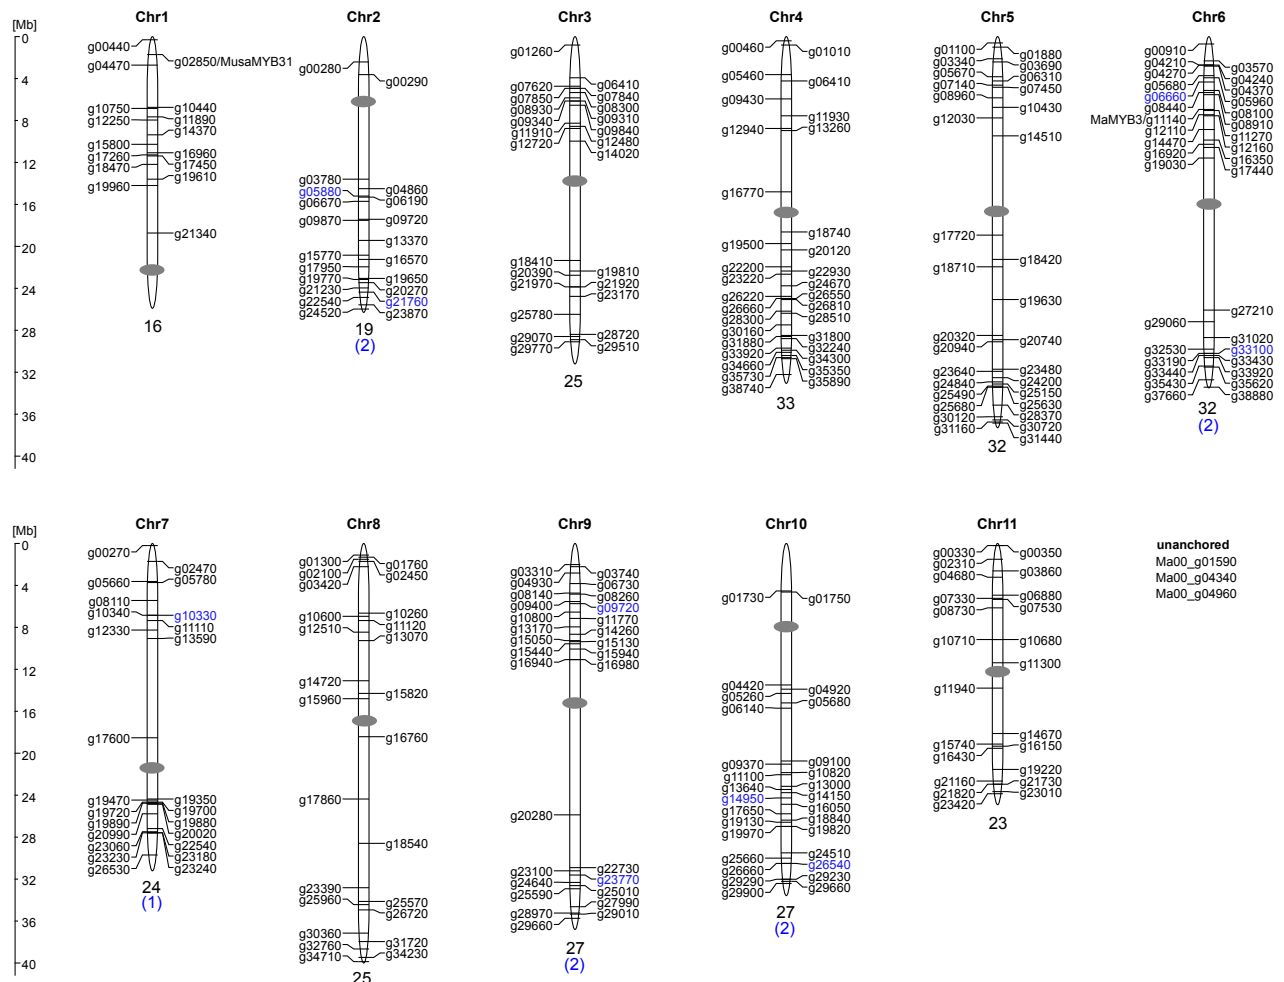

**Figure 1: Distribution of *MaMYB* genes on the eleven *M. acuminata* chromosomes.** Chromosomes are drawn to scale. The positions of centromeres (grey ovals) are roughly estimated from repeat distribution data. The chromosomal positions of the *MaMYB* genes (given in DH Pahang version 2 annotation ID) are indicated. *R2R3-MYB* genes are given in

## *M. acuminata* MYB family

black letters, *MYB* genes with more than two MYB repeats are given in blue letters. The number of *MYB* genes on each chromosome is given below the respective chromosome.

### **Phylogenetic analysis of the *M. acuminata* MYB family**

With the aim to explore the putative function of the predicted *M. acuminata* MYBs, we assigned them to plant MYB proteins with known function. For this, we chose primarily data from *A. thaliana*, as most of our knowledge about plant MYB genes has been obtained from studies of this major plant model. As known from comparable studies, most MYB proteins with similar functions cluster in the same phylogenetic clades, suggesting that closely related MYBs recognise similar/same target genes and possess cooperative, overlapping or redundant functions.

To unravel the relationships, we constructed a phylogenetic tree with 469 MYB domain amino acid sequences of MYB proteins. We used 294 MaMYBs (omitting the CDC5-like MaMYB), the complete *A. thaliana* MYB family (132 members, including 126 R2R3-MYB, five MYB3R and one MYB4R) and 43 functionally well characterised landmark R2R3-MYBs from other plant species. The phylogenetic tree topology allowed us to classify the analysed MYBs into one MYB3R clade, one MYB4R clade and 42 R2R3-MYB protein clades (Figure 2).

Most R2R3-MYB clades (31 of 42) include variable numbers of MYB proteins from Arabidopsis and banana, indicating that the appearance of most *MYB* genes in these two species predates the monocot-dicot split as observed in other studies (Du et al. 2015). Several of these clades also contain landmark MYBs from other plant species. The two clades 4 and 28 only contain Arabidopsis R2R3-MYB members, while seven clades (9, 13, 19, 21, 26, 29 and 32, displayed with white background in Figure 2) only contain banana R2R3-MYB members. Additionally, two clades, 24 with monocot anthocyanin biosynthesis regulators and 27 with the strawberry landmark flavonoid biosynthesis repressor FaMYB1 (Aharoni et al. 2001), do not contain any *A. thaliana* MYB (Figure 2).

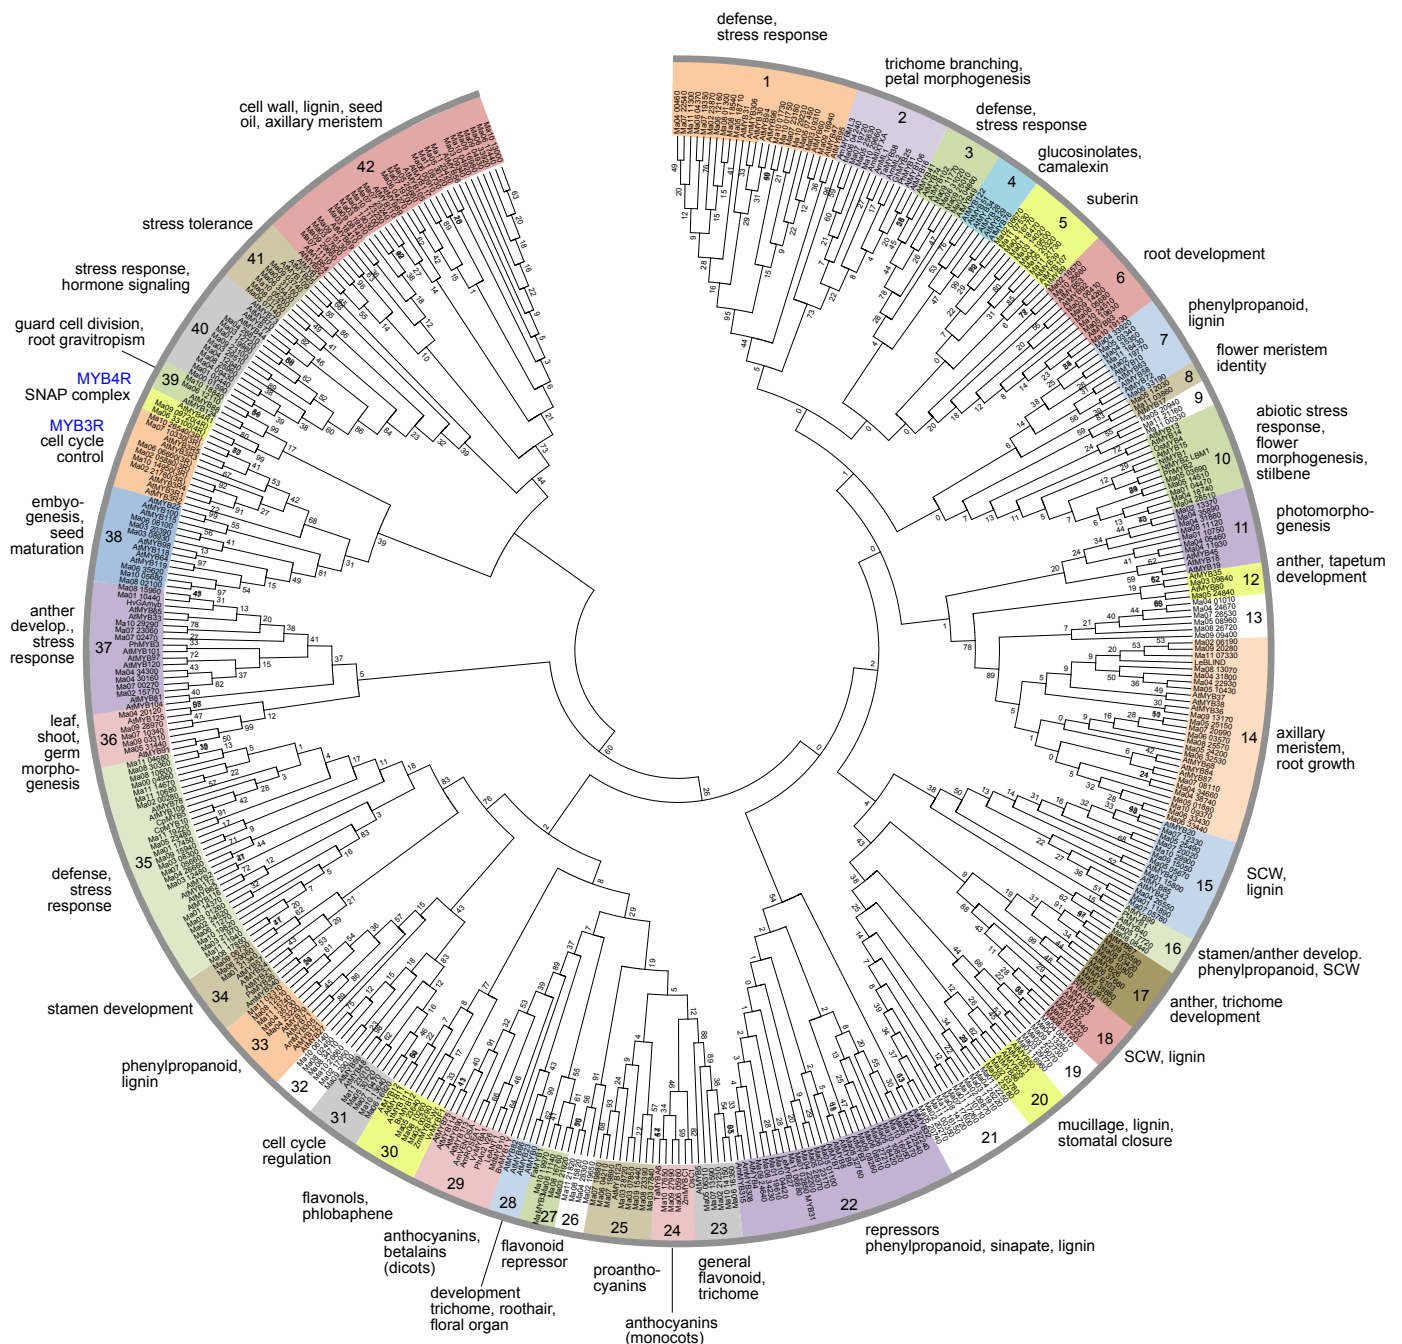

The observation of "species/order-specific" clades could be taken as a hint that *MYB* genes in these clades may have been acquired or been lost in a single order or species, during the following divergence from the most recent common ancestor, as indicated also by other studies (Baum 2008; Zhong et al. 2015; Mehta et al. 2016). One MYB clade without

## *M. acuminata* MYB family

271 *M. acuminata* orthologs was clade 28, that include the *A. thaliana* R2R3-MYBs  
 272 AtMYB0/GLABRA1 and AtMYB66/WEREWOLF, which have been identified being  
 273 involved in the formation of trichomes and root hairs from epidermal cells (Oppenheimer et  
 274 al. 1991; Lee and Schiefelbein 1999). Similar observations have been made in maize  
 275 (monocot) and sugarbeet (eudicot, caryophyllales) (Du et al. 2012b; Stracke et al. 2014), both  
 276 not containing clade 28 orthologs, while grape (eudicot, rosid) and poplar (eudicot, rosid) do  
 277 (Matus et al. 2008; Wilkins et al. 2009). It has been hypothesized, that GLABRA1-like *MYB*  
 278 genes have been acquired in rosids after the rosid-asterids split (Brockington et al. 2013). The  
 279 absence of MaMYBs in clade 28 is consistent with this hypothesis, since monocots branched  
 280 off before the separation of asterids and rosids in eudicots. Another clade without banana  
 281 R2R3-MYBs is clade 4, covering the glucosinolate biosynthesis regulators AtMYB28,  
 282 AtMYB34 and AtMYB51 (Sonderby et al. 2007; Gigolashvili et al. 2007). The absence of  
 283 MaMYBs in this clade is in good accordance with the fact that glucosilates are only present in  
 284 the Brassicaceae family. This clade is thought to have originated from a duplication event  
 285 before the divergence of Arabidopsis from Brassica (Yanhui et al. 2006).  
 286 The seven clades containing only MaMYBs were manually inspected by applying BLAST  
 287 searches at the NCBI protein database in order to identify high homology to functionally  
 288 characterized landmark plant R2R3-MYBs. In no case landmark MYB could be identified.  
 289 Consequently, these clades could be described as a lineage-specific expansion in  
 290 *M. acuminata*, reflecting a species-, genus- or order-specific adaptation. These MaMYB  
 291 proteins may have specialised functions that were acquired or expanded in *M. acuminata*  
 292 during genome evolution. Further research will be needed to decipher the biological roles of  
 293 these *MaMYB* genes.  
 294 It is well established, that R2R3-MYBs could interact with basic helix-turn-helix (BHLH)-  
 295 type transcription factors, together with WD-repeat (WDR) proteins forming a so called  
 296 trimeric MBW complex. These R2R3-MYBs are defined by a BHLH-binding consensus  
 297 motif [D/E]Lx2[R/K]x3Lx6Lx3R (Zimmermann et al. 2004) found in all BHLH-interacting  
 298 R2R3-MYBs. A search in the MaMYB proteins for the mentioned BHLH-interaction motif  
 299 identified 30 MaMYBs containing this motif (Table 1) and thus putatively interacting with  
 300 BHLH proteins. 36 of these 40 MaMYBs were all functionally assigned to clades containing  
 301 (potentially) known BHLH-interacting R2R3-MYBs: nine in clade 22 (repressors  
 302 phenylpropanoid, sinapate-, lignin regulators), six in clade 25 (proanthocyanin regulators),  
 303 four in clade 23 (general flavonoid, trichome regulators), four in clade 27 (flavonoid  
 304 repressors) and three in clade 24 (monocot anthocyanin regulators). Four MaMYBs,

*M. acuminata* MYB family

Ma02\_19650, Ma04\_28300, Ma08\_15820 and Ma11\_21820 were all found in the *M. acuminata*-specific clade 26. We suppose that these MaMYBs interact with BHLH-type transcription factors. The close relation to flavonoid biosynthesis regulators, suggest that they act similar like R2R2-MYB proanthocyanin regulators. If they regulate a Musa-specific biosynthesis pathway needs further research.

### Expression profiles for *M. acuminata* MYB genes in different organs and developmental stages

Since it is not unusual for large transcription factor families in higher organisms, that some members have redundant function, a particular transcription factor needs to be studied and characterised in the context of the whole family. In this regard, the gene expression pattern can provide a hint to gene function. In this study we used public available RNA-seq reads available at the Sequence Read Archive (Additional Table 2) to analyse the expression of the 294 *MaMYB* genes in different organs and developmental stages: embryonic cell suspension, seedling, root, young, adult and old leaf, pulp stages S1-S4, peel stages S1-S4. Filtered RNA-seq reads were aligned to the genome reference sequence and the number of mapped reads per annotated transcript were quantified and compared across the analysed samples giving normalised RNA-seq read values which are given in Table 2.

**Table 2: The expression profiles of *MaR2R3-MYB* genes in different organs and developmental stages based on RNA-seq data.** The intensity of green background is correlated to expression level given in FPKM.

| gene        | embryogenic | seedling | root | leaf | young_leaf | adult_leaf | old_leaf | pulp | pulpS1 | pulpS2 | pulpS3 | pulpS4 | peel | peelS1 | peelS2 | peelS3 | peelS4 |
|-------------|-------------|----------|------|------|------------|------------|----------|------|--------|--------|--------|--------|------|--------|--------|--------|--------|
| Ma00_g01590 | 50          | 35       | 6    | 151  | 77         | 175        | 348      | 6    | 5      | 5      | 8      | 5      | 8    | 2      | 19     | 10     | 2      |
| Ma00_g04340 | 0           | 0        | 0    | 0    | 0          | 0          | 0        | 0    | 1      | 0      | 0      | 0      | 0    | 0      | 0      | 0      | 0      |
| Ma00_g04960 | 0           | 0        | 0    | 0    | 0          | 0          | 0        | 0    | 0      | 0      | 0      | 0      | 0    | 0      | 0      | 0      | 0      |
| Ma01_g00440 | 181         | 49       | 38   | 129  | 53         | 175        | 276      | 32   | 31     | 58     | 34     | 7      | 30   | 9      | 63     | 35     | 11     |
| Ma01_g02850 | 9           | 2        | 14   | 27   | 21         | 31         | 38       | 20   | 24     | 23     | 23     | 10     | 11   | 7      | 9      | 17     | 12     |
| Ma01_g04470 | 1           | 0        | 12   | 4    | 1          | 6          | 2        | 9    | 13     | 9      | 7      | 8      | 6    | 6      | 3      | 7      | 7      |
| Ma01_g10440 | 3           | 16       | 4    | 5    | 7          | 5          | 5        | 4    | 5      | 5      | 3      | 3      | 3    | 3      | 2      | 3      | 4      |
| Ma01_g10750 | 0           | 0        | 2    | 2    | 0          | 0          | 4        | 1    | 1      | 1      | 1      | 2      | 4    | 5      | 4      | 4      | 5      |
| Ma01_g11890 | 0           | 0        | 3    | 3    | 10         | 1          | 0        | 0    | 0      | 0      | 0      | 0      | 0    | 0      | 0      | 0      | 0      |
| Ma01_g12250 | 1           | 0        | 4    | 5    | 17         | 2          | 0        | 3    | 4      | 3      | 2      | 2      | 4    | 4      | 4      | 3      | 3      |
| Ma01_g14370 | 0           | 17       | 11   | 0    | 0          | 0          | 0        | 5    | 7      | 7      | 8      | 0      | 8    | 3      | 7      | 18     | 4      |
| Ma01_g15800 | 1           | 0        | 4    | 1    | 0          | 0          | 0        | 4    | 2      | 5      | 7      | 3      | 6    | 8      | 5      | 2      | 9      |
| Ma01_g16960 | 0           | 0        | 1    | 0    | 1          | 0          | 0        | 0    | 0      | 0      | 0      | 0      | 0    | 0      | 0      | 0      | 0      |
| Ma01_g17260 | 1           | 0        | 11   | 1    | 0          | 0          | 0        | 3    | 3      | 3      | 2      | 3      | 4    | 5      | 3      | 4      | 5      |
| Ma01_g17450 | 0           | 0        | 6    | 2    | 0          | 1          | 6        | 5    | 13     | 2      | 2      | 1      | 1    | 1      | 2      | 2      | 0      |
| Ma01_g18470 | 0           | 0        | 0    | 0    | 0          | 0          | 0        | 0    | 1      | 0      | 0      | 0      | 1    | 2      | 1      | 0      | 0      |
| Ma01_g19610 | 13          | 0        | 6    | 39   | 56         | 40         | 57       | 29   | 78     | 22     | 15     | 2      | 12   | 7      | 36     | 2      | 5      |
| Ma01_g19960 | 35          | 1        | 6    | 97   | 94         | 148        | 145      | 5    | 7      | 6      | 5      | 4      | 19   | 5      | 58     | 10     | 4      |



*M. acuminata* MYB family

|             |    |    |    |     |     |     |     |    |    |    |    |    |    |    |    |    |    |
|-------------|----|----|----|-----|-----|-----|-----|----|----|----|----|----|----|----|----|----|----|
| Ma01_g21340 | 0  | 0  | 0  | 0   | 0   | 0   | 0   | 2  | 8  | 0  | 0  | 0  | 0  | 0  | 0  | 0  | 0  |
| Ma02_g00280 | 1  | 1  | 21 | 4   | 1   | 1   | 5   | 6  | 8  | 10 | 4  | 2  | 5  | 5  | 4  | 5  | 7  |
| Ma02_g00290 | 0  | 0  | 3  | 9   | 5   | 26  | 1   | 8  | 25 | 0  | 6  | 2  | 3  | 2  | 3  | 2  | 5  |
| Ma02_g03780 | 0  | 0  | 29 | 18  | 26  | 0   | 0   | 13 | 14 | 9  | 18 | 12 | 30 | 39 | 31 | 17 | 33 |
| Ma02_g04860 | 0  | 0  | 1  | 0   | 0   | 0   | 0   | 0  | 0  | 1  | 0  | 0  | 0  | 0  | 0  | 0  | 0  |
| Ma02_g05880 | 4  | 2  | 2  | 3   | 2   | 5   | 3   | 2  | 4  | 2  | 2  | 1  | 2  | 1  | 1  | 1  | 3  |
| Ma02_g06190 | 0  | 0  | 19 | 8   | 0   | 0   | 0   | 16 | 30 | 12 | 13 | 11 | 28 | 42 | 18 | 18 | 32 |
| Ma02_g06670 | 1  | 1  | 4  | 1   | 0   | 0   | 0   | 4  | 3  | 7  | 4  | 4  | 5  | 6  | 2  | 6  | 5  |
| Ma02_g09720 | 0  | 0  | 0  | 0   | 0   | 0   | 0   | 0  | 0  | 0  | 0  | 0  | 0  | 1  | 0  | 0  | 1  |
| Ma02_g09870 | 29 | 1  | 23 | 37  | 99  | 33  | 11  | 19 | 15 | 28 | 27 | 6  | 11 | 11 | 10 | 9  | 13 |
| Ma02_g13370 | 0  | 0  | 1  | 0   | 0   | 0   | 0   | 0  | 0  | 0  | 0  | 0  | 0  | 0  | 0  | 0  | 0  |
| Ma02_g15770 | 6  | 0  | 1  | 0   | 0   | 1   | 0   | 1  | 2  | 0  | 1  | 0  | 1  | 1  | 1  | 0  | 1  |
| Ma02_g16570 | 0  | 0  | 0  | 0   | 1   | 0   | 1   | 0  | 0  | 0  | 0  | 0  | 0  | 0  | 0  | 0  | 0  |
| Ma02_g17950 | 8  | 0  | 46 | 14  | 4   | 6   | 13  | 33 | 53 | 35 | 16 | 26 | 19 | 19 | 14 | 20 | 22 |
| Ma02_g19650 | 0  | 0  | 3  | 3   | 5   | 1   | 0   | 7  | 10 | 5  | 3  | 11 | 9  | 15 | 8  | 6  | 5  |
| Ma02_g19770 | 0  | 0  | 0  | 0   | 0   | 0   | 0   | 0  | 0  | 0  | 0  | 0  | 0  | 0  | 0  | 0  | 0  |
| Ma02_g20270 | 3  | 0  | 3  | 16  | 57  | 4   | 0   | 1  | 1  | 2  | 2  | 1  | 4  | 3  | 4  | 3  | 7  |
| Ma02_g21230 | 2  | 2  | 1  | 5   | 14  | 3   | 1   | 3  | 8  | 3  | 0  | 0  | 1  | 0  | 3  | 2  | 0  |
| Ma02_g21760 | 0  | 3  | 7  | 2   | 2   | 0   | 0   | 8  | 11 | 7  | 8  | 7  | 8  | 11 | 5  | 5  | 12 |
| Ma02_g22540 | 1  | 0  | 7  | 4   | 2   | 6   | 7   | 1  | 1  | 1  | 2  | 0  | 1  | 1  | 1  | 1  | 1  |
| Ma02_g23870 | 3  | 0  | 0  | 7   | 4   | 20  | 3   | 2  | 8  | 0  | 0  | 0  | 0  | 0  | 0  | 0  | 0  |
| Ma02_g24520 | 0  | 0  | 0  | 0   | 0   | 0   | 0   | 0  | 1  | 0  | 0  | 0  | 0  | 0  | 0  | 0  | 0  |
| Ma03_g01260 | 11 | 0  | 6  | 16  | 0   | 0   | 61  | 9  | 31 | 3  | 1  | 2  | 2  | 1  | 3  | 4  | 1  |
| Ma03_g06410 | 0  | 0  | 11 | 1   | 0   | 0   | 0   | 1  | 0  | 3  | 0  | 1  | 1  | 2  | 0  | 2  | 1  |
| Ma03_g07620 | 0  | 0  | 3  | 0   | 0   | 0   | 0   | 0  | 0  | 0  | 0  | 0  | 0  | 0  | 0  | 0  | 0  |
| Ma03_g07840 | 0  | 0  | 2  | 1   | 2   | 0   | 0   | 10 | 24 | 9  | 3  | 5  | 2  | 1  | 3  | 1  | 2  |
| Ma03_g07850 | 0  | 0  | 1  | 1   | 1   | 0   | 0   | 1  | 2  | 1  | 0  | 1  | 2  | 2  | 2  | 3  | 1  |
| Ma03_g08300 | 0  | 1  | 3  | 0   | 0   | 0   | 1   | 1  | 5  | 0  | 0  | 0  | 1  | 0  | 0  | 6  | 0  |
| Ma03_g08930 | 0  | 0  | 0  | 0   | 0   | 0   | 0   | 0  | 0  | 0  | 0  | 0  | 0  | 0  | 0  | 0  | 0  |
| Ma03_g09310 | 0  | 0  | 0  | 12  | 42  | 7   | 1   | 0  | 0  | 0  | 0  | 0  | 0  | 0  | 0  | 0  | 0  |
| Ma03_g09340 | 2  | 0  | 7  | 1   | 1   | 0   | 1   | 5  | 8  | 4  | 5  | 2  | 3  | 4  | 2  | 3  | 5  |
| Ma03_g09840 | 0  | 0  | 0  | 0   | 0   | 0   | 0   | 0  | 0  | 0  | 0  | 0  | 0  | 0  | 0  | 0  | 0  |
| Ma03_g11910 | 5  | 8  | 25 | 35  | 76  | 25  | 6   | 12 | 10 | 13 | 12 | 13 | 24 | 26 | 30 | 18 | 22 |
| Ma03_g12480 | 0  | 0  | 4  | 0   | 0   | 0   | 0   | 1  | 1  | 1  | 0  | 0  | 0  | 0  | 0  | 1  | 0  |
| Ma03_g12720 | 16 | 10 | 4  | 45  | 59  | 49  | 70  | 2  | 2  | 2  | 2  | 3  | 18 | 2  | 32 | 35 | 3  |
| Ma03_g14020 | 0  | 0  | 1  | 0   | 0   | 0   | 0   | 2  | 1  | 4  | 1  | 3  | 2  | 3  | 1  | 3  | 2  |
| Ma03_g18410 | 0  | 0  | 0  | 1   | 2   | 0   | 0   | 4  | 15 | 0  | 0  | 0  | 0  | 0  | 0  | 0  | 0  |
| Ma03_g19810 | 0  | 0  | 2  | 0   | 0   | 0   | 0   | 0  | 0  | 0  | 0  | 0  | 0  | 0  | 0  | 0  | 0  |
| Ma03_g20390 | 5  | 1  | 1  | 2   | 2   | 0   | 4   | 2  | 1  | 3  | 2  | 2  | 0  | 1  | 0  | 0  | 1  |
| Ma03_g21920 | 5  | 0  | 2  | 17  | 13  | 32  | 22  | 4  | 12 | 2  | 2  | 0  | 2  | 0  | 6  | 3  | 0  |
| Ma03_g21970 | 0  | 0  | 1  | 0   | 0   | 0   | 0   | 0  | 0  | 0  | 0  | 0  | 0  | 0  | 0  | 0  | 0  |
| Ma03_g23170 | 0  | 0  | 3  | 4   | 8   | 2   | 0   | 2  | 2  | 3  | 1  | 2  | 4  | 6  | 2  | 3  | 4  |
| Ma03_g25780 | 3  | 2  | 60 | 18  | 14  | 3   | 0   | 37 | 28 | 81 | 18 | 22 | 40 | 57 | 29 | 26 | 48 |
| Ma03_g28720 | 3  | 3  | 1  | 2   | 0   | 1   | 5   | 1  | 3  | 1  | 0  | 1  | 0  | 0  | 0  | 0  | 0  |
| Ma03_g29070 | 0  | 0  | 1  | 2   | 4   | 2   | 0   | 1  | 1  | 0  | 3  | 0  | 2  | 1  | 2  | 1  | 2  |
| Ma03_g29510 | 14 | 4  | 5  | 44  | 49  | 65  | 55  | 9  | 25 | 5  | 5  | 2  | 6  | 3  | 7  | 11 | 3  |
| Ma03_g29770 | 1  | 0  | 3  | 1   | 1   | 0   | 0   | 2  | 3  | 4  | 0  | 2  | 1  | 2  | 1  | 1  | 2  |
| Ma04_g00460 | 2  | 0  | 1  | 9   | 14  | 20  | 2   | 0  | 0  | 0  | 0  | 0  | 1  | 0  | 2  | 1  | 0  |
| Ma04_g01010 | 0  | 0  | 7  | 0   | 0   | 0   | 1   | 1  | 3  | 1  | 1  | 0  | 1  | 1  | 1  | 0  | 1  |
| Ma04_g05460 | 0  | 0  | 0  | 0   | 0   | 0   | 0   | 0  | 0  | 0  | 1  | 0  | 1  | 0  | 1  | 0  | 1  |
| Ma04_g06410 | 0  | 1  | 1  | 0   | 1   | 0   | 0   | 0  | 0  | 1  | 0  | 0  | 0  | 0  | 0  | 0  | 0  |
| Ma04_g09430 | 4  | 1  | 9  | 12  | 17  | 19  | 2   | 4  | 4  | 2  | 6  | 5  | 8  | 11 | 7  | 3  | 11 |
| Ma04_g11930 | 0  | 0  | 0  | 0   | 0   | 0   | 0   | 0  | 0  | 0  | 0  | 0  | 0  | 0  | 0  | 0  | 0  |
| Ma04_g12940 | 4  | 0  | 2  | 3   | 6   | 2   | 4   | 2  | 3  | 1  | 2  | 0  | 1  | 0  | 1  | 0  | 0  |
| Ma04_g13260 | 0  | 2  | 2  | 1   | 1   | 1   | 2   | 2  | 3  | 2  | 3  | 1  | 0  | 0  | 0  | 0  | 0  |
| Ma04_g16770 | 0  | 1  | 1  | 1   | 0   | 1   | 0   | 1  | 0  | 1  | 0  | 3  | 1  | 1  | 0  | 1  | 0  |
| Ma04_g18740 | 11 | 1  | 7  | 2   | 1   | 1   | 5   | 2  | 0  | 0  | 6  | 0  | 1  | 0  | 1  | 2  | 0  |
| Ma04_g19500 | 0  | 0  | 4  | 1   | 0   | 0   | 0   | 2  | 4  | 3  | 0  | 1  | 1  | 1  | 1  | 1  | 0  |
| Ma04_g20120 | 0  | 0  | 0  | 0   | 0   | 0   | 0   | 0  | 0  | 0  | 0  | 0  | 0  | 0  | 0  | 0  | 0  |
| Ma04_g22200 | 0  | 0  | 3  | 0   | 0   | 0   | 0   | 3  | 2  | 8  | 1  | 3  | 1  | 1  | 0  | 1  | 0  |
| Ma04_g22930 | 0  | 0  | 4  | 1   | 0   | 0   | 0   | 2  | 2  | 3  | 0  | 2  | 4  | 6  | 2  | 3  | 4  |
| Ma04_g23220 | 0  | 0  | 5  | 3   | 0   | 0   | 1   | 1  | 3  | 1  | 1  | 1  | 4  | 3  | 6  | 1  | 6  |
| Ma04_g24670 | 0  | 0  | 33 | 6   | 0   | 0   | 0   | 24 | 32 | 24 | 19 | 19 | 17 | 22 | 9  | 16 | 19 |
| Ma04_g26220 | 0  | 1  | 1  | 2   | 1   | 1   | 0   | 1  | 3  | 1  | 1  | 0  | 4  | 2  | 11 | 2  | 1  |
| Ma04_g26550 | 0  | 0  | 5  | 1   | 1   | 0   | 0   | 2  | 3  | 3  | 1  | 1  | 1  | 1  | 1  | 1  | 3  |
| Ma04_g26660 | 0  | 2  | 22 | 1   | 0   | 1   | 3   | 12 | 27 | 11 | 5  | 4  | 1  | 0  | 2  | 1  | 2  |
| Ma04_g26810 | 41 | 78 | 15 | 153 | 258 | 145 | 185 | 39 | 35 | 74 | 32 | 17 | 33 | 13 | 54 | 50 | 14 |
| Ma04_g28300 | 0  | 0  | 0  | 0   | 0   | 0   | 0   | 0  | 0  | 0  | 0  | 0  | 0  | 0  | 0  | 0  | 0  |
| Ma04_g28510 | 8  | 1  | 3  | 11  | 2   | 22  | 10  | 9  | 13 | 8  | 14 | 2  | 3  | 2  | 5  | 3  | 3  |
| Ma04_g30160 | 1  | 0  | 0  | 0   | 1   | 1   | 0   | 2  | 5  | 1  | 0  | 0  | 0  | 0  | 0  | 0  | 0  |
| Ma04_g31800 | 0  | 0  | 0  | 1   | 0   | 0   | 3   | 0  | 1  | 1  | 0  | 0  | 2  | 0  | 1  | 6  | 0  |



*M. acuminata* MYB family

|             |    |   |    |    |     |    |     |    |     |    |    |    |    |    |    |    |    |
|-------------|----|---|----|----|-----|----|-----|----|-----|----|----|----|----|----|----|----|----|
| Ma04_g31880 | 0  | 0 | 2  | 0  | 0   | 0  | 0   | 1  | 0   | 1  | 1  | 0  | 1  | 1  | 2  | 0  | 1  |
| Ma04_g32240 | 0  | 0 | 1  | 0  | 0   | 0  | 0   | 2  | 2   | 4  | 2  | 0  | 0  | 1  | 0  | 0  | 1  |
| Ma04_g33920 | 3  | 7 | 2  | 2  | 4   | 1  | 1   | 0  | 1   | 1  | 0  | 0  | 1  | 1  | 1  | 3  | 1  |
| Ma04_g34300 | 1  | 0 | 0  | 1  | 2   | 1  | 0   | 2  | 4   | 1  | 1  | 2  | 1  | 1  | 0  | 0  | 1  |
| Ma04_g34660 | 0  | 1 | 0  | 0  | 0   | 0  | 0   | 1  | 0   | 0  | 0  | 3  | 0  | 0  | 0  | 0  | 0  |
| Ma04_g35350 | 0  | 0 | 0  | 0  | 0   | 0  | 0   | 0  | 0   | 0  | 0  | 0  | 0  | 0  | 0  | 0  | 0  |
| Ma04_g35730 | 0  | 0 | 4  | 0  | 0   | 0  | 0   | 0  | 1   | 0  | 0  | 0  | 0  | 0  | 0  | 0  | 0  |
| Ma04_g35890 | 1  | 0 | 0  | 0  | 0   | 0  | 0   | 1  | 2   | 1  | 0  | 0  | 0  | 1  | 0  | 1  | 0  |
| Ma04_g38740 | 0  | 0 | 1  | 0  | 0   | 0  | 0   | 0  | 0   | 0  | 0  | 0  | 1  | 1  | 1  | 0  | 1  |
| Ma05_g01100 | 0  | 0 | 0  | 0  | 0   | 0  | 0   | 1  | 0   | 0  | 0  | 0  | 0  | 0  | 0  | 0  | 0  |
| Ma05_g01880 | 0  | 0 | 2  | 1  | 0   | 0  | 0   | 2  | 3   | 2  | 0  | 2  | 2  | 1  | 1  | 2  | 2  |
| Ma05_g03340 | 0  | 0 | 2  | 1  | 1   | 0  | 1   | 1  | 0   | 2  | 0  | 0  | 0  | 0  | 0  | 0  | 0  |
| Ma05_g03690 | 10 | 0 | 1  | 14 | 2   | 25 | 28  | 1  | 0   | 1  | 1  | 1  | 2  | 0  | 8  | 1  | 0  |
| Ma05_g05670 | 1  | 0 | 1  | 0  | 0   | 0  | 0   | 1  | 2   | 0  | 0  | 0  | 0  | 0  | 0  | 1  | 0  |
| Ma05_g06310 | 4  | 1 | 1  | 4  | 4   | 4  | 8   | 1  | 3   | 1  | 1  | 0  | 0  | 0  | 1  | 0  | 0  |
| Ma05_g07140 | 4  | 0 | 0  | 0  | 0   | 0  | 0   | 0  | 1   | 1  | 1  | 0  | 0  | 0  | 0  | 2  | 0  |
| Ma05_g07450 | 4  | 0 | 0  | 2  | 4   | 3  | 1   | 1  | 2   | 1  | 1  | 0  | 0  | 0  | 0  | 0  | 0  |
| Ma05_g08960 | 27 | 1 | 9  | 34 | 47  | 53 | 23  | 17 | 38  | 11 | 8  | 10 | 9  | 10 | 3  | 9  | 12 |
| Ma05_g10430 | 0  | 0 | 2  | 1  | 0   | 0  | 0   | 2  | 1   | 1  | 2  | 3  | 3  | 6  | 2  | 1  | 4  |
| Ma05_g12030 | 4  | 1 | 2  | 1  | 1   | 1  | 2   | 3  | 8   | 2  | 1  | 2  | 2  | 2  | 2  | 1  | 1  |
| Ma05_g14510 | 1  | 0 | 4  | 48 | 0   | 1  | 190 | 1  | 0   | 1  | 2  | 0  | 1  | 1  | 1  | 3  | 0  |
| Ma05_g17720 | 0  | 0 | 1  | 0  | 0   | 0  | 0   | 0  | 1   | 0  | 0  | 0  | 4  | 6  | 4  | 2  | 4  |
| Ma05_g18420 | 0  | 0 | 0  | 0  | 0   | 1  | 0   | 1  | 4   | 0  | 0  | 0  | 0  | 0  | 0  | 0  | 0  |
| Ma05_g18710 | 4  | 0 | 3  | 3  | 4   | 4  | 5   | 3  | 5   | 2  | 3  | 0  | 2  | 1  | 4  | 2  | 1  |
| Ma05_g19630 | 0  | 0 | 6  | 0  | 0   | 0  | 0   | 1  | 2   | 3  | 0  | 1  | 1  | 1  | 0  | 2  | 0  |
| Ma05_g20320 | 1  | 0 | 2  | 10 | 5   | 14 | 19  | 0  | 0   | 1  | 0  | 0  | 1  | 1  | 0  | 1  | 0  |
| Ma05_g20740 | 0  | 4 | 1  | 2  | 9   | 0  | 0   | 2  | 5   | 1  | 2  | 0  | 1  | 0  | 2  | 1  | 0  |
| Ma05_g20940 | 1  | 0 | 5  | 11 | 0   | 0  | 44  | 1  | 1   | 0  | 1  | 0  | 0  | 1  | 0  | 0  | 1  |
| Ma05_g23480 | 0  | 0 | 0  | 0  | 0   | 0  | 0   | 2  | 3   | 5  | 0  | 0  | 0  | 0  | 0  | 0  | 1  |
| Ma05_g23640 | 0  | 0 | 1  | 1  | 0   | 3  | 0   | 2  | 7   | 0  | 2  | 0  | 2  | 1  | 3  | 0  | 2  |
| Ma05_g24200 | 0  | 0 | 0  | 0  | 0   | 0  | 0   | 0  | 1   | 0  | 0  | 0  | 0  | 0  | 0  | 0  | 0  |
| Ma05_g24840 | 0  | 0 | 0  | 0  | 0   | 0  | 0   | 0  | 0   | 0  | 0  | 0  | 0  | 0  | 0  | 0  | 0  |
| Ma05_g25150 | 0  | 0 | 6  | 2  | 0   | 0  | 0   | 3  | 4   | 4  | 5  | 1  | 3  | 3  | 2  | 2  | 4  |
| Ma05_g25490 | 0  | 1 | 2  | 2  | 1   | 3  | 1   | 1  | 2   | 2  | 1  | 1  | 1  | 2  | 1  | 1  | 2  |
| Ma05_g25630 | 0  | 0 | 0  | 4  | 15  | 0  | 1   | 1  | 6   | 0  | 0  | 0  | 0  | 0  | 0  | 0  | 0  |
| Ma05_g25680 | 1  | 0 | 1  | 2  | 2   | 1  | 3   | 7  | 24  | 2  | 3  | 1  | 0  | 0  | 1  | 1  | 0  |
| Ma05_g28370 | 0  | 0 | 4  | 4  | 9   | 4  | 1   | 1  | 0   | 1  | 0  | 1  | 2  | 2  | 1  | 1  | 2  |
| Ma05_g30120 | 0  | 3 | 16 | 1  | 0   | 1  | 0   | 4  | 7   | 4  | 2  | 2  | 2  | 2  | 1  | 2  | 2  |
| Ma05_g30720 | 0  | 0 | 19 | 1  | 0   | 0  | 0   | 7  | 12  | 10 | 2  | 4  | 3  | 3  | 3  | 1  | 6  |
| Ma05_g31160 | 9  | 3 | 5  | 6  | 7   | 7  | 7   | 5  | 7   | 4  | 4  | 3  | 2  | 2  | 3  | 2  | 4  |
| Ma05_g31440 | 0  | 3 | 2  | 68 | 266 | 2  | 0   | 43 | 12  | 88 | 71 | 2  | 26 | 2  | 89 | 9  | 2  |
| Ma06_g00910 | 0  | 7 | 1  | 5  | 1   | 1  | 15  | 0  | 0   | 0  | 0  | 0  | 1  | 1  | 1  | 3  | 0  |
| Ma06_g03570 | 0  | 0 | 4  | 2  | 0   | 0  | 0   | 3  | 5   | 3  | 3  | 4  | 5  | 7  | 4  | 3  | 7  |
| Ma06_g04210 | 0  | 0 | 5  | 2  | 1   | 0  | 0   | 5  | 5   | 2  | 7  | 4  | 3  | 4  | 3  | 2  | 5  |
| Ma06_g04240 | 1  | 0 | 1  | 1  | 4   | 0  | 0   | 7  | 29  | 0  | 0  | 0  | 0  | 0  | 0  | 0  | 0  |
| Ma06_g04270 | 11 | 1 | 1  | 1  | 0   | 1  | 2   | 3  | 6   | 3  | 2  | 1  | 0  | 0  | 1  | 0  | 0  |
| Ma06_g04370 | 7  | 0 | 10 | 13 | 5   | 29 | 15  | 1  | 3   | 0  | 0  | 0  | 2  | 1  | 6  | 1  | 0  |
| Ma06_g05680 | 0  | 0 | 7  | 4  | 0   | 0  | 0   | 20 | 15  | 34 | 15 | 16 | 8  | 9  | 2  | 11 | 10 |
| Ma06_g05960 | 0  | 0 | 6  | 4  | 4   | 0  | 0   | 13 | 9   | 19 | 13 | 9  | 4  | 4  | 3  | 9  | 2  |
| Ma06_g06660 | 3  | 2 | 2  | 3  | 2   | 3  | 6   | 2  | 3   | 1  | 2  | 2  | 1  | 1  | 1  | 1  | 1  |
| Ma06_g08100 | 3  | 0 | 0  | 0  | 0   | 0  | 0   | 0  | 0   | 0  | 0  | 0  | 0  | 0  | 0  | 0  | 0  |
| Ma06_g08440 | 3  | 0 | 1  | 0  | 0   | 0  | 0   | 0  | 0   | 0  | 0  | 0  | 0  | 1  | 0  | 0  | 0  |
| Ma06_g08910 | 4  | 3 | 5  | 28 | 68  | 23 | 16  | 8  | 6   | 11 | 9  | 5  | 10 | 4  | 20 | 14 | 3  |
| Ma06_g11140 | 4  | 0 | 1  | 14 | 6   | 33 | 16  | 2  | 4   | 2  | 0  | 1  | 1  | 0  | 4  | 1  | 0  |
| Ma06_g11270 | 0  | 1 | 10 | 0  | 0   | 0  | 0   | 0  | 1   | 0  | 0  | 0  | 1  | 0  | 1  | 3  | 0  |
| Ma06_g12110 | 0  | 1 | 1  | 1  | 0   | 1  | 1   | 1  | 2   | 1  | 2  | 1  | 1  | 1  | 1  | 1  | 2  |
| Ma06_g12160 | 1  | 1 | 1  | 1  | 1   | 2  | 2   | 1  | 2   | 0  | 1  | 1  | 1  | 0  | 0  | 2  | 1  |
| Ma06_g14470 | 0  | 0 | 3  | 1  | 1   | 1  | 2   | 2  | 1   | 2  | 2  | 2  | 1  | 0  | 1  | 3  | 0  |
| Ma06_g16350 | 0  | 1 | 0  | 3  | 4   | 2  | 5   | 1  | 2   | 1  | 1  | 2  | 1  | 0  | 0  | 1  | 0  |
| Ma06_g16920 | 3  | 1 | 40 | 38 | 30  | 13 | 13  | 60 | 108 | 51 | 34 | 46 | 54 | 72 | 36 | 45 | 61 |
| Ma06_g17440 | 0  | 0 | 0  | 0  | 0   | 0  | 0   | 1  | 1   | 1  | 0  | 1  | 1  | 0  | 1  | 1  | 2  |
| Ma06_g19030 | 0  | 0 | 2  | 0  | 0   | 0  | 1   | 3  | 8   | 1  | 1  | 1  | 1  | 1  | 0  | 1  | 0  |
| Ma06_g27210 | 2  | 2 | 8  | 6  | 2   | 6  | 16  | 3  | 4   | 5  | 0  | 2  | 2  | 2  | 1  | 2  | 2  |
| Ma06_g29060 | 9  | 2 | 0  | 0  | 0   | 0  | 1   | 2  | 7   | 1  | 0  | 0  | 0  | 0  | 0  | 0  | 0  |
| Ma06_g31020 | 7  | 3 | 7  | 6  | 3   | 9  | 8   | 1  | 2   | 2  | 2  | 0  | 2  | 1  | 7  | 1  | 1  |
| Ma06_g32530 | 7  | 0 | 0  | 2  | 1   | 4  | 2   | 0  | 0   | 0  | 0  | 0  | 0  | 0  | 0  | 0  | 1  |
| Ma06_g33100 | 4  | 6 | 3  | 3  | 2   | 3  | 3   | 4  | 5   | 3  | 2  | 6  | 3  | 4  | 2  | 2  | 5  |
| Ma06_g33190 | 0  | 0 | 0  | 1  | 1   | 1  | 1   | 0  | 0   | 0  | 0  | 0  | 0  | 0  | 0  | 0  | 0  |
| Ma06_g33430 | 0  | 1 | 11 | 2  | 1   | 1  | 0   | 8  | 20  | 7  | 2  | 4  | 3  | 5  | 3  | 4  | 3  |
| Ma06_g33440 | 38 | 9 | 21 | 26 | 12  | 27 | 53  | 24 | 36  | 21 | 23 | 15 | 14 | 14 | 9  | 11 | 20 |
| Ma06_g33920 | 0  | 7 | 10 | 4  | 3   | 0  | 1   | 5  | 5   | 4  | 3  | 6  | 10 | 13 | 8  | 9  | 9  |

*M. acuminata* MYB family

|             |    |     |    |    |    |    |    |    |    |    |    |     |    |    |    |    |    |
|-------------|----|-----|----|----|----|----|----|----|----|----|----|-----|----|----|----|----|----|
| Ma06_g35430 | 6  | 15  | 28 | 31 | 49 | 14 | 31 | 20 | 37 | 22 | 13 | 8   | 33 | 24 | 63 | 25 | 17 |
| Ma06_g35620 | 0  | 0   | 0  | 0  | 0  | 0  | 0  | 0  | 0  | 0  | 0  | 0   | 0  | 0  | 1  | 0  | 0  |
| Ma06_g37660 | 0  | 0   | 0  | 0  | 0  | 0  | 0  | 0  | 0  | 0  | 0  | 0   | 0  | 0  | 0  | 0  | 0  |
| Ma06_g38880 | 1  | 0   | 0  | 1  | 2  | 0  | 0  | 0  | 0  | 0  | 0  | 0   | 0  | 0  | 0  | 0  | 0  |
| Ma07_g00270 | 0  | 0   | 1  | 1  | 1  | 0  | 0  | 0  | 1  | 0  | 0  | 0   | 0  | 1  | 0  | 0  | 0  |
| Ma07_g02470 | 5  | 1   | 4  | 5  | 5  | 5  | 7  | 5  | 6  | 7  | 2  | 3   | 3  | 3  | 2  | 2  | 4  |
| Ma07_g05660 | 0  | 0   | 0  | 0  | 0  | 0  | 0  | 0  | 0  | 0  | 0  | 0   | 1  | 0  | 0  | 2  | 0  |
| Ma07_g05780 | 0  | 1   | 1  | 3  | 6  | 2  | 1  | 2  | 3  | 2  | 2  | 1   | 2  | 1  | 1  | 2  | 2  |
| Ma07_g08110 | 0  | 1   | 5  | 1  | 0  | 0  | 4  | 0  | 1  | 0  | 0  | 0   | 0  | 0  | 0  | 1  | 0  |
| Ma07_g10330 | 2  | 4   | 4  | 1  | 1  | 1  | 2  | 2  | 1  | 2  | 1  | 2   | 2  | 2  | 1  | 1  | 3  |
| Ma07_g10340 | 2  | 11  | 6  | 23 | 82 | 3  | 2  | 11 | 22 | 10 | 8  | 5   | 14 | 8  | 15 | 28 | 5  |
| Ma07_g11110 | 0  | 0   | 0  | 3  | 5  | 5  | 1  | 0  | 0  | 0  | 0  | 0   | 0  | 0  | 0  | 0  | 0  |
| Ma07_g12330 | 0  | 0   | 1  | 7  | 5  | 18 | 3  | 1  | 2  | 1  | 0  | 0   | 0  | 0  | 1  | 0  | 0  |
| Ma07_g13590 | 0  | 0   | 1  | 6  | 4  | 16 | 3  | 0  | 1  | 0  | 0  | 0   | 0  | 0  | 0  | 0  | 0  |
| Ma07_g17600 | 1  | 1   | 8  | 2  | 4  | 0  | 1  | 1  | 1  | 1  | 0  | 1   | 2  | 2  | 2  | 2  | 2  |
| Ma07_g19350 | 2  | 0   | 1  | 22 | 18 | 44 | 23 | 4  | 15 | 0  | 0  | 1   | 9  | 1  | 26 | 11 | 0  |
| Ma07_g19470 | 3  | 0   | 15 | 7  | 5  | 6  | 6  | 54 | 80 | 62 | 33 | 42  | 10 | 14 | 6  | 9  | 10 |
| Ma07_g19700 | 0  | 0   | 0  | 0  | 0  | 0  | 0  | 1  | 4  | 0  | 0  | 0   | 0  | 0  | 0  | 0  | 0  |
| Ma07_g19720 | 0  | 0   | 7  | 7  | 26 | 1  | 0  | 5  | 11 | 6  | 3  | 1   | 4  | 2  | 12 | 1  | 1  |
| Ma07_g19880 | 1  | 1   | 5  | 4  | 0  | 0  | 2  | 10 | 14 | 7  | 11 | 8   | 9  | 12 | 3  | 8  | 12 |
| Ma07_g19890 | 0  | 0   | 0  | 0  | 0  | 0  | 0  | 0  | 2  | 0  | 0  | 0   | 0  | 0  | 0  | 0  | 0  |
| Ma07_g20020 | 2  | 0   | 1  | 0  | 0  | 1  | 1  | 0  | 0  | 1  | 0  | 0   | 0  | 0  | 1  | 1  | 0  |
| Ma07_g20990 | 0  | 0   | 2  | 0  | 0  | 0  | 0  | 2  | 2  | 1  | 3  | 0   | 2  | 2  | 1  | 1  | 1  |
| Ma07_g22540 | 5  | 1   | 0  | 8  | 13 | 12 | 7  | 1  | 3  | 0  | 0  | 0   | 1  | 0  | 3  | 1  | 0  |
| Ma07_g23060 | 0  | 1   | 2  | 1  | 2  | 0  | 0  | 2  | 4  | 2  | 3  | 1   | 1  | 2  | 1  | 1  | 1  |
| Ma07_g23180 | 3  | 1   | 1  | 3  | 8  | 1  | 0  | 4  | 14 | 1  | 1  | 0   | 3  | 4  | 2  | 1  | 5  |
| Ma07_g23230 | 0  | 171 | 9  | 2  | 2  | 1  | 3  | 34 | 6  | 10 | 12 | 106 | 9  | 1  | 2  | 33 | 2  |
| Ma07_g23240 | 16 | 23  | 7  | 9  | 9  | 12 | 11 | 9  | 7  | 10 | 12 | 6   | 5  | 6  | 3  | 3  | 7  |
| Ma07_g26530 | 0  | 1   | 1  | 1  | 0  | 2  | 1  | 1  | 4  | 0  | 0  | 0   | 0  | 0  | 0  | 0  | 0  |
| Ma08_g01300 | 6  | 0   | 3  | 6  | 12 | 3  | 7  | 0  | 0  | 0  | 0  | 0   | 1  | 0  | 0  | 2  | 0  |
| Ma08_g01760 | 6  | 0   | 0  | 2  | 2  | 2  | 4  | 0  | 1  | 0  | 0  | 0   | 1  | 0  | 1  | 1  | 1  |
| Ma08_g02100 | 0  | 0   | 0  | 0  | 0  | 0  | 0  | 0  | 0  | 0  | 0  | 0   | 0  | 0  | 0  | 0  | 0  |
| Ma08_g02450 | 1  | 3   | 5  | 2  | 2  | 1  | 3  | 7  | 7  | 10 | 9  | 1   | 5  | 3  | 13 | 2  | 3  |
| Ma08_g03420 | 0  | 0   | 1  | 0  | 0  | 0  | 0  | 0  | 0  | 0  | 0  | 0   | 0  | 0  | 0  | 0  | 0  |
| Ma08_g10260 | 1  | 0   | 3  | 7  | 16 | 3  | 1  | 4  | 12 | 1  | 1  | 3   | 13 | 18 | 6  | 7  | 19 |
| Ma08_g10600 | 0  | 0   | 0  | 0  | 0  | 0  | 1  | 0  | 0  | 1  | 1  | 0   | 0  | 0  | 0  | 1  | 0  |
| Ma08_g11120 | 0  | 0   | 0  | 0  | 0  | 0  | 0  | 0  | 1  | 1  | 0  | 0   | 0  | 0  | 0  | 0  | 0  |
| Ma08_g12510 | 0  | 0   | 3  | 1  | 0  | 0  | 0  | 2  | 3  | 2  | 2  | 0   | 2  | 2  | 1  | 1  | 5  |
| Ma08_g13070 | 0  | 0   | 10 | 4  | 0  | 0  | 0  | 17 | 12 | 30 | 18 | 8   | 15 | 19 | 7  | 12 | 21 |
| Ma08_g14720 | 0  | 1   | 5  | 5  | 14 | 1  | 0  | 2  | 4  | 1  | 3  | 2   | 6  | 8  | 6  | 2  | 7  |
| Ma08_g15820 | 0  | 1   | 4  | 2  | 1  | 1  | 2  | 6  | 7  | 6  | 6  | 4   | 4  | 5  | 4  | 5  | 2  |
| Ma08_g15960 | 2  | 6   | 3  | 1  | 2  | 1  | 1  | 4  | 5  | 1  | 2  | 5   | 2  | 2  | 1  | 1  | 2  |
| Ma08_g16760 | 2  | 0   | 2  | 10 | 5  | 13 | 21 | 3  | 5  | 3  | 0  | 3   | 3  | 1  | 4  | 7  | 0  |
| Ma08_g17860 | 0  | 0   | 1  | 2  | 0  | 0  | 8  | 0  | 0  | 0  | 0  | 0   | 2  | 0  | 0  | 7  | 0  |
| Ma08_g18540 | 0  | 0   | 0  | 1  | 0  | 1  | 2  | 0  | 0  | 0  | 0  | 0   | 0  | 0  | 0  | 2  | 0  |
| Ma08_g23390 | 0  | 0   | 0  | 0  | 0  | 0  | 0  | 2  | 6  | 0  | 0  | 0   | 0  | 0  | 1  | 0  | 0  |
| Ma08_g25570 | 7  | 1   | 16 | 11 | 7  | 6  | 7  | 20 | 20 | 26 | 25 | 10  | 19 | 16 | 19 | 16 | 23 |
| Ma08_g25960 | 9  | 11  | 9  | 21 | 22 | 32 | 15 | 13 | 18 | 17 | 11 | 5   | 9  | 9  | 9  | 5  | 13 |
| Ma08_g26720 | 1  | 0   | 7  | 9  | 19 | 4  | 13 | 1  | 1  | 2  | 1  | 1   | 1  | 0  | 1  | 1  | 1  |
| Ma08_g30360 | 0  | 0   | 5  | 0  | 0  | 0  | 0  | 1  | 4  | 0  | 0  | 0   | 1  | 0  | 0  | 3  | 0  |
| Ma08_g31720 | 0  | 0   | 1  | 1  | 1  | 0  | 0  | 0  | 0  | 0  | 1  | 0   | 0  | 0  | 0  | 0  | 0  |
| Ma08_g32760 | 1  | 3   | 11 | 4  | 4  | 1  | 1  | 5  | 5  | 4  | 9  | 3   | 9  | 8  | 16 | 5  | 7  |
| Ma08_g34230 | 0  | 0   | 2  | 1  | 0  | 1  | 0  | 2  | 4  | 1  | 1  | 1   | 2  | 1  | 1  | 2  | 2  |
| Ma08_g34710 | 0  | 0   | 15 | 1  | 0  | 0  | 0  | 16 | 17 | 20 | 8  | 20  | 5  | 5  | 4  | 6  | 7  |
| Ma09_g03310 | 2  | 1   | 11 | 4  | 8  | 3  | 1  | 2  | 5  | 1  | 1  | 2   | 3  | 3  | 5  | 1  | 3  |
| Ma09_g03740 | 8  | 1   | 3  | 4  | 5  | 5  | 4  | 4  | 6  | 3  | 3  | 4   | 2  | 2  | 2  | 2  | 2  |
| Ma09_g04930 | 0  | 2   | 12 | 2  | 0  | 0  | 0  | 10 | 7  | 22 | 7  | 3   | 5  | 5  | 9  | 4  | 3  |
| Ma09_g06730 | 1  | 0   | 0  | 0  | 0  | 0  | 0  | 1  | 1  | 1  | 0  | 0   | 0  | 0  | 0  | 0  | 0  |
| Ma09_g08140 | 0  | 0   | 2  | 0  | 1  | 0  | 0  | 3  | 10 | 0  | 0  | 0   | 0  | 0  | 0  | 0  | 0  |
| Ma09_g08260 | 15 | 1   | 9  | 6  | 8  | 4  | 3  | 9  | 9  | 13 | 10 | 4   | 8  | 9  | 8  | 6  | 8  |
| Ma09_g09400 | 0  | 0   | 7  | 1  | 0  | 0  | 1  | 1  | 2  | 2  | 0  | 1   | 1  | 0  | 1  | 1  | 0  |
| Ma09_g09720 | 1  | 0   | 3  | 1  | 0  | 1  | 0  | 2  | 2  | 2  | 2  | 1   | 1  | 1  | 0  | 1  | 1  |
| Ma09_g10800 | 0  | 0   | 5  | 0  | 0  | 0  | 0  | 1  | 1  | 2  | 0  | 2   | 1  | 1  | 0  | 1  | 0  |
| Ma09_g11770 | 2  | 0   | 0  | 0  | 0  | 0  | 0  | 0  | 0  | 0  | 0  | 0   | 0  | 0  | 0  | 0  | 0  |
| Ma09_g13170 | 0  | 0   | 5  | 3  | 0  | 0  | 0  | 6  | 7  | 4  | 10 | 4   | 9  | 12 | 4  | 5  | 13 |
| Ma09_g14260 | 0  | 0   | 1  | 0  | 0  | 0  | 0  | 0  | 0  | 0  | 0  | 0   | 1  | 3  | 0  | 2  | 1  |
| Ma09_g15050 | 1  | 0   | 0  | 0  | 0  | 0  | 0  | 1  | 0  | 0  | 1  | 1   | 1  | 1  | 0  | 0  | 0  |
| Ma09_g15130 | 1  | 0   | 1  | 0  | 0  | 0  | 0  | 1  | 0  | 0  | 3  | 0   | 1  | 1  | 0  | 1  | 1  |
| Ma09_g15440 | 0  | 0   | 1  | 2  | 5  | 1  | 0  | 5  | 9  | 3  | 2  | 4   | 1  | 1  | 2  | 2  | 1  |
| Ma09_g15940 | 2  | 0   | 2  | 3  | 0  | 0  | 13 | 0  | 0  | 0  | 0  | 0   | 0  | 0  | 0  | 0  | 0  |
| Ma09_g16940 | 3  | 0   | 0  | 4  | 5  | 8  | 2  | 0  | 1  | 0  | 0  | 0   | 1  | 2  | 1  | 0  | 1  |

*M. acuminata* MYB family

|             |    |    |    |    |    |    |    |    |    |    |    |    |    |    |    |    |    |
|-------------|----|----|----|----|----|----|----|----|----|----|----|----|----|----|----|----|----|
| Ma09_g16980 | 0  | 1  | 7  | 0  | 0  | 0  | 0  | 1  | 4  | 1  | 0  | 1  | 1  | 1  | 1  | 1  | 1  |
| Ma09_g20280 | 0  | 0  | 62 | 8  | 0  | 0  | 0  | 44 | 31 | 73 | 45 | 27 | 26 | 30 | 21 | 29 | 23 |
| Ma09_g22730 | 0  | 0  | 2  | 0  | 0  | 0  | 0  | 1  | 1  | 0  | 0  | 1  | 1  | 1  | 1  | 1  | 1  |
| Ma09_g23100 | 32 | 2  | 3  | 36 | 45 | 65 | 32 | 10 | 9  | 21 | 9  | 1  | 5  | 2  | 12 | 4  | 3  |
| Ma09_g24640 | 0  | 0  | 8  | 4  | 3  | 0  | 8  | 7  | 12 | 6  | 3  | 6  | 4  | 5  | 2  | 6  | 4  |
| Ma09_g25010 | 4  | 0  | 2  | 4  | 3  | 4  | 7  | 1  | 1  | 1  | 2  | 0  | 2  | 1  | 2  | 1  | 2  |
| Ma09_g25590 | 0  | 0  | 2  | 0  | 0  | 0  | 0  | 0  | 0  | 0  | 0  | 0  | 0  | 0  | 0  | 0  | 0  |
| Ma09_g27990 | 0  | 0  | 1  | 1  | 2  | 0  | 0  | 1  | 2  | 2  | 0  | 1  | 2  | 2  | 1  | 1  | 3  |
| Ma09_g28970 | 1  | 0  | 0  | 7  | 26 | 2  | 0  | 1  | 4  | 0  | 0  | 0  | 0  | 0  | 0  | 0  | 0  |
| Ma09_g29010 | 0  | 2  | 32 | 6  | 0  | 1  | 3  | 25 | 26 | 32 | 15 | 25 | 15 | 16 | 7  | 17 | 22 |
| Ma09_g29660 | 0  | 0  | 0  | 0  | 0  | 2  | 0  | 0  | 0  | 0  | 0  | 0  | 0  | 0  | 0  | 0  | 0  |
| Ma10_g01730 | 0  | 0  | 0  | 1  | 4  | 1  | 0  | 0  | 0  | 0  | 0  | 0  | 0  | 0  | 0  | 0  | 0  |
| Ma10_g01750 | 0  | 0  | 0  | 0  | 1  | 1  | 0  | 0  | 0  | 0  | 0  | 0  | 0  | 0  | 0  | 0  | 0  |
| Ma10_g04420 | 0  | 0  | 1  | 4  | 10 | 2  | 2  | 1  | 2  | 1  | 1  | 0  | 1  | 1  | 3  | 0  | 0  |
| Ma10_g04920 | 3  | 0  | 0  | 1  | 3  | 2  | 0  | 0  | 1  | 0  | 0  | 0  | 0  | 0  | 1  | 0  | 0  |
| Ma10_g05260 | 0  | 0  | 0  | 1  | 1  | 1  | 3  | 0  | 0  | 0  | 0  | 0  | 0  | 0  | 0  | 0  | 0  |
| Ma10_g05680 | 0  | 0  | 0  | 0  | 0  | 0  | 0  | 0  | 0  | 0  | 1  | 0  | 0  | 0  | 0  | 0  | 0  |
| Ma10_g06140 | 0  | 0  | 0  | 0  | 0  | 0  | 1  | 0  | 1  | 0  | 0  | 0  | 0  | 0  | 0  | 0  | 0  |
| Ma10_g09100 | 0  | 0  | 0  | 1  | 4  | 0  | 0  | 0  | 0  | 0  | 0  | 0  | 0  | 0  | 0  | 0  | 0  |
| Ma10_g09370 | 0  | 0  | 4  | 3  | 1  | 0  | 5  | 2  | 2  | 3  | 3  | 1  | 3  | 3  | 2  | 4  | 2  |
| Ma10_g10820 | 0  | 0  | 2  | 0  | 0  | 0  | 0  | 4  | 14 | 1  | 0  | 1  | 1  | 2  | 1  | 1  | 1  |
| Ma10_g11100 | 0  | 1  | 6  | 2  | 0  | 0  | 6  | 0  | 0  | 0  | 0  | 0  | 2  | 0  | 0  | 7  | 0  |
| Ma10_g13000 | 3  | 0  | 5  | 10 | 2  | 21 | 16 | 1  | 1  | 1  | 0  | 2  | 1  | 1  | 1  | 1  | 1  |
| Ma10_g13640 | 2  | 1  | 40 | 31 | 30 | 34 | 12 | 22 | 25 | 19 | 20 | 25 | 35 | 48 | 21 | 28 | 44 |
| Ma10_g14150 | 0  | 1  | 1  | 2  | 2  | 3  | 4  | 1  | 3  | 1  | 0  | 1  | 1  | 0  | 1  | 1  | 0  |
| Ma10_g14950 | 0  | 0  | 3  | 2  | 0  | 0  | 0  | 4  | 8  | 1  | 2  | 3  | 4  | 4  | 2  | 3  | 7  |
| Ma10_g16050 | 5  | 1  | 10 | 28 | 74 | 23 | 13 | 9  | 14 | 16 | 4  | 3  | 7  | 4  | 16 | 3  | 4  |
| Ma10_g17650 | 0  | 30 | 0  | 0  | 0  | 0  | 0  | 4  | 13 | 1  | 0  | 0  | 2  | 2  | 2  | 4  | 1  |
| Ma10_g18840 | 3  | 1  | 5  | 2  | 1  | 2  | 2  | 4  | 6  | 3  | 6  | 2  | 3  | 5  | 2  | 2  | 5  |
| Ma10_g19130 | 0  | 0  | 2  | 0  | 0  | 0  | 0  | 1  | 0  | 0  | 1  | 1  | 1  | 0  | 1  | 0  | 1  |
| Ma10_g19820 | 1  | 0  | 2  | 6  | 0  | 0  | 22 | 0  | 0  | 0  | 0  | 0  | 5  | 0  | 12 | 9  | 0  |
| Ma10_g19970 | 1  | 0  | 0  | 2  | 6  | 3  | 1  | 1  | 3  | 1  | 0  | 0  | 0  | 0  | 0  | 0  | 0  |
| Ma10_g24510 | 9  | 4  | 2  | 7  | 16 | 6  | 4  | 3  | 4  | 2  | 4  | 2  | 1  | 1  | 1  | 1  | 2  |
| Ma10_g25660 | 1  | 0  | 0  | 0  | 0  | 0  | 0  | 1  | 1  | 0  | 0  | 1  | 0  | 0  | 0  | 0  | 0  |
| Ma10_g26540 | 5  | 7  | 6  | 4  | 3  | 4  | 4  | 6  | 8  | 4  | 4  | 6  | 4  | 5  | 2  | 3  | 6  |
| Ma10_g26660 | 2  | 0  | 6  | 3  | 1  | 2  | 2  | 10 | 14 | 11 | 8  | 5  | 4  | 3  | 3  | 5  | 6  |
| Ma10_g29230 | 6  | 0  | 1  | 4  | 6  | 9  | 3  | 0  | 1  | 1  | 0  | 0  | 1  | 0  | 2  | 0  | 0  |
| Ma10_g29290 | 4  | 1  | 1  | 2  | 2  | 2  | 2  | 1  | 1  | 0  | 1  | 1  | 1  | 1  | 0  | 0  | 1  |
| Ma10_g29660 | 2  | 0  | 1  | 15 | 60 | 0  | 0  | 1  | 3  | 0  | 0  | 0  | 0  | 0  | 0  | 0  | 0  |
| Ma10_g29900 | 5  | 1  | 9  | 10 | 7  | 11 | 11 | 8  | 8  | 7  | 9  | 8  | 9  | 11 | 10 | 10 | 7  |
| Ma11_g00330 | 0  | 0  | 4  | 0  | 0  | 0  | 0  | 0  | 1  | 0  | 0  | 1  | 0  | 0  | 0  | 0  | 0  |
| Ma11_g00350 | 0  | 0  | 6  | 5  | 13 | 1  | 0  | 3  | 5  | 2  | 2  | 2  | 5  | 7  | 5  | 3  | 6  |
| Ma11_g02310 | 0  | 0  | 2  | 1  | 0  | 0  | 0  | 2  | 1  | 1  | 4  | 0  | 2  | 2  | 1  | 1  | 4  |
| Ma11_g03860 | 0  | 0  | 2  | 13 | 47 | 1  | 0  | 5  | 14 | 4  | 1  | 0  | 2  | 1  | 5  | 1  | 1  |
| Ma11_g04680 | 20 | 2  | 0  | 32 | 6  | 57 | 64 | 0  | 1  | 1  | 0  | 0  | 4  | 0  | 7  | 10 | 0  |
| Ma11_g06880 | 22 | 4  | 15 | 13 | 7  | 19 | 12 | 31 | 41 | 39 | 30 | 14 | 7  | 6  | 4  | 9  | 11 |
| Ma11_g07330 | 0  | 0  | 0  | 0  | 0  | 0  | 0  | 0  | 0  | 0  | 0  | 0  | 0  | 0  | 0  | 0  | 0  |
| Ma11_g07530 | 0  | 0  | 5  | 2  | 1  | 1  | 1  | 6  | 3  | 14 | 4  | 2  | 3  | 5  | 1  | 4  | 2  |
| Ma11_g08730 | 1  | 1  | 1  | 1  | 1  | 1  | 1  | 1  | 1  | 1  | 0  | 1  | 1  | 0  | 1  | 0  | 1  |
| Ma11_g10680 | 1  | 2  | 5  | 2  | 1  | 0  | 3  | 12 | 21 | 20 | 6  | 3  | 6  | 7  | 5  | 8  | 6  |
| Ma11_g10710 | 0  | 1  | 2  | 1  | 4  | 0  | 0  | 2  | 5  | 2  | 1  | 2  | 3  | 1  | 6  | 2  | 1  |
| Ma11_g11300 | 2  | 0  | 0  | 0  | 0  | 0  | 1  | 0  | 0  | 0  | 0  | 0  | 0  | 0  | 0  | 1  | 0  |
| Ma11_g11940 | 0  | 0  | 5  | 0  | 0  | 0  | 0  | 0  | 1  | 0  | 0  | 0  | 0  | 0  | 0  | 0  | 0  |
| Ma11_g14670 | 0  | 1  | 2  | 0  | 0  | 0  | 0  | 0  | 0  | 0  | 0  | 0  | 2  | 0  | 2  | 5  | 0  |
| Ma11_g15740 | 4  | 0  | 2  | 5  | 7  | 4  | 6  | 6  | 9  | 4  | 6  | 5  | 2  | 1  | 3  | 2  | 1  |
| Ma11_g16150 | 1  | 2  | 3  | 10 | 37 | 2  | 1  | 4  | 7  | 4  | 6  | 1  | 3  | 3  | 3  | 2  | 4  |
| Ma11_g16430 | 0  | 0  | 0  | 0  | 0  | 0  | 0  | 0  | 0  | 0  | 0  | 0  | 0  | 0  | 0  | 0  | 0  |
| Ma11_g19220 | 1  | 0  | 1  | 0  | 0  | 0  | 0  | 0  | 1  | 1  | 0  | 0  | 2  | 0  | 0  | 7  | 0  |
| Ma11_g21160 | 1  | 0  | 9  | 3  | 0  | 1  | 12 | 2  | 4  | 0  | 4  | 0  | 0  | 1  | 0  | 0  | 0  |
| Ma11_g21730 | 0  | 0  | 2  | 1  | 0  | 1  | 0  | 2  | 2  | 3  | 0  | 1  | 2  | 4  | 0  | 2  | 2  |
| Ma11_g21820 | 0  | 0  | 0  | 2  | 2  | 4  | 0  | 0  | 0  | 0  | 0  | 0  | 0  | 0  | 1  | 0  | 0  |
| Ma11_g23010 | 0  | 0  | 6  | 1  | 0  | 0  | 0  | 3  | 3  | 5  | 2  | 2  | 2  | 3  | 1  | 2  | 3  |
| Ma11_g23420 | 1  | 0  | 2  | 0  | 0  | 0  | 0  | 1  | 2  | 0  | 0  | 0  | 0  | 0  | 0  | 0  | 0  |

328

329

330 Our expression analyses revealed that *M. acuminata* MYBs have diverse expression patterns  
331 in different organs. Many of the *MaMYBs* exhibited low transcript abundance levels with

## *M. acuminata* MYB family

expression in only one or a few organs. This is in good accordance with other transcription factor genes, typically known to be expressed in this manner due to functional specificity and diversity. The highest number of expressed *MaMYB* genes (222; 75.5%) is observed in roots, followed by pulp (210; 71.4%), leaf (204; 69.4%), peel (197; 67%) and embryonic cell suspension (130; 44.2%). The fewest *MaMYB* genes are expressed in seedlings (99; 33.7%) in the considered dataset. 41 *MaMYB* genes (14%) were expressed in all samples analysed (albeit with varying expression levels), which suggested that these MaMYBs play regulatory roles at multiple developmental stages. 14 *MaMYB* genes (4.8%) lacked expression information in any of the analysed samples, possibly indicating that these genes are expressed in other organs (e.g. pseudostem, flower, bract), specific cells, at specific developmental stages, under special conditions or being pseudogenes. 279 MaMYBs (94.8%) are expressed in at least one of the analysed samples, although the transcript abundance of some genes was very low. Some *MaMYB* genes were expressed in all analysed RNA-seq samples at similar levels (e.g. R2R3-MYBs *Ma06\_33440* and *Ma11\_06880*) while others show variance in transcript abundance with low (no) levels in one or several organs and high levels in others (or vice versa). For example, *Ma02\_16570*, *Ma03\_09310*, *Ma07\_11110*, *Ma10\_01730*, *Ma10\_05260* and *Ma10\_09100* show organ-specific expression, as their transcripts were exclusively detected in leaves, which hints to leaf-specific functionality. *Ma03\_07840* and *Ma07\_19470* were found to be predominantly expressed in pulp, showing expression also in other analysed organs, but not in the seedling. Overall, this results suggests that the corresponding MaMYB regulators are limited to distinct organs, tissues, cells or conditions. Some clustered *MaMYB* genes (Table 1), which are considered to be created by duplication events within the genome and termed as paralogs, showed different expression profiles, while other clustered *MaMYB* genes did not. For example, the clustered R2R3-MYB genes *Ma06\_33430* and *Ma06\_33440* (both in the axillary meristem/root growth cluster 14) are both expressed in pulps, peels and roots, but *Ma06\_33440* is also highly expressed in leaves and embryonic cells, while *Ma06\_33430* is not. The expression pattern of *Ma03\_07840* and *Ma03\_07850* (both in the proanthocyanin-related cluster 25) is, in contrast, very similar, with low expression in root, leaf, pulp and peel, but no expression in embryonic cells and roots. These results could point to functional redundancy of the genes *Ma03\_07840* and *Ma03\_07850*, while *Ma06\_33430* and *Ma06\_33440* could be (partly) involved in distinct aspects of growth processes.

## Conclusions

The given genome-wide identification, chromosomal organisation, functional classification and expression analyses of *M. acuminata* MYB genes provide a first step towards cloning and functional dissection to decode the role of MYB genes in this economically interesting species.

## Authors' contributions

AP and RS conceived and designed research. BP and RS conducted experiments. BP analyzed and visualized transcriptome data. RS and BW interpreted the data. RS wrote the manuscript. All authors read and approved the final manuscript.

## Acknowledgements

We are grateful to Melanie Kuhlmann for excellent technical assistance. The research stay of Ashutosh Pandey at the Weisshaar lab was made possible by the Alexander von Humboldt Foundation (AvH).

## References

- Aharoni A, De Vos CHR, Wein M, Sun Z, Greco R, Kroon A, Mol JNM, O'Connell AP (2001) The strawberry FaMYB1 transcription factor suppresses anthocyanin and flavonol accumulation in transgenic tobacco. *The Plant Journal* 28 (3):319-332
- Altschul SF, Gish W, Miller W, Myers EW, Lipman DJ (1990) Basic local alignment search tool. *Journal of Molecular Biology* 215 (3):403-410
- Baum D (2008) Reading a Phylogenetic Tree: The Meaning of Monophyletic Groups. *Nature Education* 1 (1):190
- Brockington SF, Alvarez-Fernandez R, Landis JB, Alcorn K, Walker RH, Thomas MM, Hileman LC, Glover BJ (2013) Evolutionary analysis of the MIXTA gene family highlights potential targets for the study of cellular differentiation. *Molecular Biology and Evolution* 30 (3):526-540
- Castañeda NEN, Alves GSC, Almeida RM, Amorim EP, Fortes Ferreira C, Togawa RC, Costa MMDC, Grynberg P, Santos JRP, Cares JE, Miller RNG (2017) Gene expression analysis in *Musa acuminata* during compatible interactions with *Meloidogyne incognita*. *Annals of Botany* 119 (5):915-930
- Chaw SM, Chang CC, Chen HL, Li WH (2004) Dating the monocot-dicot divergence and the origin of core eudicots using whole chloroplast genomes. *Journal of Molecular Evolution* 58 (4):424-441
- Cooper GM (2000) Regulation of transcription in eukaryotes. In: *The cell: A molecular approach*. Sinauer Associates, Sunderland, MA,
- D'Hont A, Denoeud F, Aury JM, Baurens FC, Carreel F, Garsmeur O, Noel B, Bocs S, Droc G, Rouard M, Da Silva C, Jabbari K, Cardi C, Poulain J, Souquet M, Labadie K, Jourda C, Lenggellé J, Rodier-Goud M, Alberti A, Bernard M, Correa M, Ayyampalayam S, Mckain MR, Leebens-Mack J, Burgess D, Freeling M, Mbéguié-A-Mbéguié D, Chabannes M, Wicker T, Panaud O, Barbosa J, Hribova E, Heslop-Harrison P, Habas R, Rivallan R, Francois P, Poirion C, Kilian A, Burthia D, Jenny C,



- 409 Bakry F, Brown S, Guignon V, Kema G, Dita M, Waalwijk C, Joseph S, Dievart A,  
410 Jaillon O, Leclercq J, Argout X, Lyons E, Almeida A, Jeridi M, Dolezel J, Roux N,  
411 Risterucci AM, Weissenbach J, Ruiz M, Glaszmann JC, Quétier F, Yahiaoui N,  
412 Wincker P (2012) The banana (*Musa acuminata*) genome and the evolution of  
413 monocotyledonous plants. *Nature* 488 (7410):213-217
- 414 Dobin A, Davis CA, Schlesinger F, Drenkow J, Zaleski C, Jha S, Batut P, Chaisson M,  
415 Gingeras TR (2013) STAR: ultrafast universal RNA-seq aligner. *Bioinformatics* 29  
416 (1):15-21
- 417 Droc G, Larivière D, Guignon V, Yahiaoui N, This D, Garsmeur O, Dereeper A, Hamelin C,  
418 Argout X, Dufayard JF, Lengelle J, Baurens FC, Cenci A, Pitollat B, D'Hont A, Ruiz  
419 M, Rouard M, Bocs S (2013) The banana genome hub. *Database* (Oxford) 2013  
420 (bat035)
- 421 Du H, Feng BR, Yang SS, Huang YB, Tang YX (2012a) The R2R3-MYB transcription factor  
422 gene family in maize. *PLoS One* 7 (6):e37463.
- 423 Du H, Liang Z, Zhao S, Nan MG, Phan Tran LS, Lu K, Huang YB, Li JN (2015) The  
424 Evolutionary History of R2R3-MYB Proteins Across 50 Eukaryotes: New Insights  
425 Into Subfamily Classification and Expansion. *Scientific Reports* 5 (11037)
- 426 Du H, Yang SS, Liang Z, Feng BR, Liu L, Huang YB, Tang YX (2012b) Genome-wide  
427 analysis of the MYB transcription factor superfamily in soybean. *BMC Plant Biology*  
428 12 (106):106
- 429 Dubos C, Stracke R, Grotewold E, Weisshaar B, Martin C, Lepiniec L (2010) MYB  
430 transcription factors in Arabidopsis. *Trends in Plant Science* 15:573-581
- 431 Fan ZQ, Ba LJ, Shan W, Yun-Yi X, Wang-Jin L, Jian-Fei K, Jian-Ye C (2018) A banana  
432 R2R3-MYB transcription factor MaMYB3 is involved in fruit ripening through  
433 modulation of starch degradation by repressing starch degradation-related genes and  
434 MabHLH6. *The Plant Journal* 96(1): 1191-1205
- 435 Frison EA, Sharrock SL (1999) The economic, nutritional and social importance of bananas  
436 in the world. In: Picq Cea (ed) *Bananas and Food Security*. INIBAP, Montpellier,  
437 France, pp 21-35
- 438 Gigolashvili T, Berger B, Mock HP, Muller C, Weisshaar B, Flugge UI (2007) The  
439 transcription factor HIG1/MYB51 regulates indolic glucosinolate biosynthesis in  
440 Arabidopsis thaliana. *The Plant Journal* 50 (5):886-901
- 441 Haak M, Vinke S, Keller W, Droste J, Rückert C, Kalinowski J, Pucker B (2018) High  
442 Quality de Novo Transcriptome Assembly of *Croton tiglium*. *Frontiers in Molecular*  
443 *Biosciences* 5:62
- 444 Hajiebrahimi A, Owji H, Hemmati S (2017) Genome-wide identification, functional  
445 prediction, and evolutionary analysis of the R2R3-MYB superfamily in *Brassica*  
446 *napus*. *Genome* 60 (10):797-814
- 447 Jia L, Clegg MT, Jiang T (2004) Evolutionary dynamics of the DNA-binding domains in  
448 putative R2R3-MYB genes identified from rice subspecies indica and japonica  
449 genomes. *Plant Physiology* 134 (2):575-585
- 450 Kumar S, Stecher G, Tamura K (2016) MEGA7: Molecular Evolutionary Genetics Analysis  
451 Version 7.0 for Bigger Datasets. *Molecular Biology and Evolution* 33 (7):1870-1874
- 452 Langridge WHR (2006) Edible Vaccines. *Scientific American* Sp 16:46-53
- 453 Lee MM, Schiefelbein J (1999) WEREWOLF, a MYB-related protein in Arabidopsis, is a  
454 position-dependent regulator of epidermal cell patterning. *Cell* 24 (5):473-483
- 455 Liao Y, Smyth GK, Shi W (2014) featureCounts: an efficient general purpose program for  
456 assigning sequence reads to genomic features. *Bioinformatics* 30 (7):923-930
- 457 Liu X, Yu W, Zhang X, Wang G, Cao F, Cheng H (2017) Identification and expression  
458 analysis under abiotic stress of the R2R3-MYB genes in *Ginkgo biloba* L. *Physical*  
459 *and Molecular Biology of Plants* 23 (3):503-516



*M. acuminata* MYB family

- 460 Martin G, Baurens FC, Droc G, Rouard M, Cenci A, Kilian A, Hastie A, Doležel J, Aury JM,  
461 Alberti A, Carreel F, D'Hont A (2016) Improvement of the banana "Musa acuminata"  
462 reference sequence using NGS data and semi-automated bioinformatics methods.  
463 BMC Genetics 17 (243)
- 464 Matus JT, Aquea F, Arce-Johnson P (2008) Analysis of the grape MYB R2R3 subfamily  
465 reveals expanded wine quality-related clades and conserved gene structure  
466 organization across Vitis and Arabidopsis genomes. BMC Plant Biology 8 (83)
- 467 Mehta RS, Bryant D, Rosenberg NA (2016) The probability of monophyly of a sample of  
468 gene lineages on a species tree. Proceedings of the National Academy of Sciences U S  
469 A 113 (29):8002-8009
- 470 Negi S, Tak H, Ganapathi TR (2015) Cloning and functional characterization of MusaVND1  
471 using transgenic banana plants. Transgenic Research 24 (3):571-585
- 472 Ogata K, Kanei-Ishii C, Sasaki M, Hatanaka H, Nagadoi A, Enari M, Nakamura H,  
473 Nishimura Y, Ishii S, Sarai A (1996) The cavity in the hydrophobic core of Myb  
474 DNA-binding domain is reserved for DNA recognition and trans-activation. Nature  
475 Structural Biology 3 (2):178-187
- 476 Oppenheimer DG, Herman PL, Sivakumaran S, Esch J, Marks MD (1991) A *myb* gene  
477 required for leaf trichome differentiation in Arabidopsis is expressed in stipules. Cell  
478 67:483-493
- 479 Riechmann JL, Heard J, Martin G, Reuber L, Jiang CZ, Keddie J, Adam L, Pineda O,  
480 Ratcliffe OJ, Samaha RR, Creelman R, Pilgrim M, Broun P, Zhang JZ, Ghandehari D,  
481 Sherman BK, Yu CL (2000) Arabidopsis transcription factors: Genome-wide  
482 comparative analysis among eukaryotes. Science 290 (5499):2105-2110
- 483 Salih H, Gong W, He S, Sun G, Sun J, Du X (2016) Genome-wide characterization and  
484 expression analysis of MYB transcription factors in Gossypium hirsutum. BMC  
485 Genetics 17 (1):129
- 486 Sonderby IE, Hansen BG, Bjarnholt N, Ticconi C, Halkier BA, Kliebenstein DJ (2007) A  
487 systems biology approach identifies a R2R3 MYB gene subfamily with distinct and  
488 overlapping functions in regulation of aliphatic glucosinolates. PLoS One 2  
489 (12):e1322
- 490 Song C, Yang Y, Yang T, Ba L, Zhang H, Han Y, Xiao Y, Shan W, Kuang J, Chen J, Lu W  
491 (2019) MaMYB4 recruits histone deacetylase MaHDA2 and modulates the expression  
492 of omega-3 fatty acid desaturase genes during cold stress response in banana fruit.  
493 Plant and Cell Physiology 60 (11):2410-2422
- 494 Stracke R, Holtgräwe D, Schneider J, Pucker B, Rosleff Sørensen T, Weisshaar B (2014)  
495 Genome-wide identification and characterisation of R2R3-MYB genes in sugar beet  
496 (Beta vulgaris). BMC Plant Biology 14 (249)
- 497 Stracke R, Werber M, Weisshaar B (2001) The *R2R3-MYB* gene family in *Arabidopsis*  
498 *thaliana*. Current Opinion in Plant Biology 4:447-456
- 499 Tak H, Negi S, Ganapathi TR (2017) Overexpression of MusaMYB31, a R2R3 type MYB  
500 transcription factor gene indicate its role as a negative regulator of lignin biosynthesis  
501 in banana. PLoS ONE 12 (2):e0172695
- 502 Wilkins O, Nahal H, Foong J, Provart NJ, Campbell MM (2009) Expansion and  
503 diversification of the Populus R2R3-MYB family of transcription factors. Plant  
504 Physiology 149 (2):981-993
- 505 Wu W, Yang YL, He WM, Rouard M, Li WM, Xu M, Roux N, Ge XJ (2016) Whole genome  
506 sequencing of a banana wild relative Musa itinerans provides insights into lineage-  
507 specific diversification of the Musa genus. Scientific Reports 6 (31586):srep31586
- 508 Yang QS, Gao J, He WD, Dou TX, Ding LJ, Wu JH, Li CY, Peng XX, Zhang S, Yi GJ  
509 (2015) Comparative transcriptomics analysis reveals difference of key gene  
510 expression between banana and plantain in response to cold stress. BMC Genomics

*M. acuminata* MYB family

511 16:446  
512 Yanhui C, Xiaoyuan Y, Kun H, Meihua L, Jigang L, Zhaofeng G, Zhiqiang L, Yunfei Z,  
513 Xiaoxiao W, Xiaoming Q, Yunping S, Li Z, Xiaohui D, Jingchu L, Xing-Wang D,  
514 Zhangliang C, Hongya G, Li-Jia Q (2006) The MYB transcription factor superfamily  
515 of Arabidopsis: expression analysis and phylogenetic comparison with the rice MYB  
516 family. Plant Molecular Biology 60 (1):107-124  
517 Zhong Y, Yin H, Sargent DJ, Malnoy M, Cheng ZM (2015) Species-specific duplications  
518 driving the recent expansion of NBS-LRR genes in five Rosaceae species. BMC  
519 Genomics 16:77  
520 Zimmermann IM, Heim MA, Weisshaar B, Uhrig JF (2004) Comprehensive identification of  
521 *Arabidopsis thaliana* MYB transcription factors interacting with R/B-like BHLH  
522 proteins. The Plant Journal 40:22-34  
523  
524
